# Supplementary material for: An Efficient Workflow for Quality Control Marker Screening and Metabolite Discovery in Dietary Herbs by LC-Orbitrap-MS/MS and Chemometric Methods: A Case Study of Chrysanthemum Flowers
Source: MDPI journal article supplement (doi:10.3390/foods13071008), 2024-03-26
Supplement: s1 [file s1]

## *Supplementary data*

# **An Efficient Workflow for Quality Control Marker Screening and Metabolite Discovery in Dietary Herbs by LC-Orbitrap-MS/MS and Chemometric Methods: A Case Study of *Chrysanthemum* Flowers**

Hanwen Yuan, Qingling Xie, Ling Liang, Jiangyi Luo, Sai Jiang, Caiyun Peng  
and Wei Wang \*

TCM and Ethnomedicine Innovation & Development International Laboratory,  
Innovative Material Medical Research Institute, School of Pharmacy, Hunan  
University of Chinese Medicine, Changsha 410208, China;  
hanwyuan@hnucm.edu.cn (H.Y.); xieql12@126.com (Q.X.);  
2022369511@stu.hnucm.edu.cn (L.L.); jyiluo1998@163.com (J.L.);  
saijiang626@hotmail.com (S.J.); paudy@126.com (C.P.)

\* Correspondence: wangwei402@hotmail.com

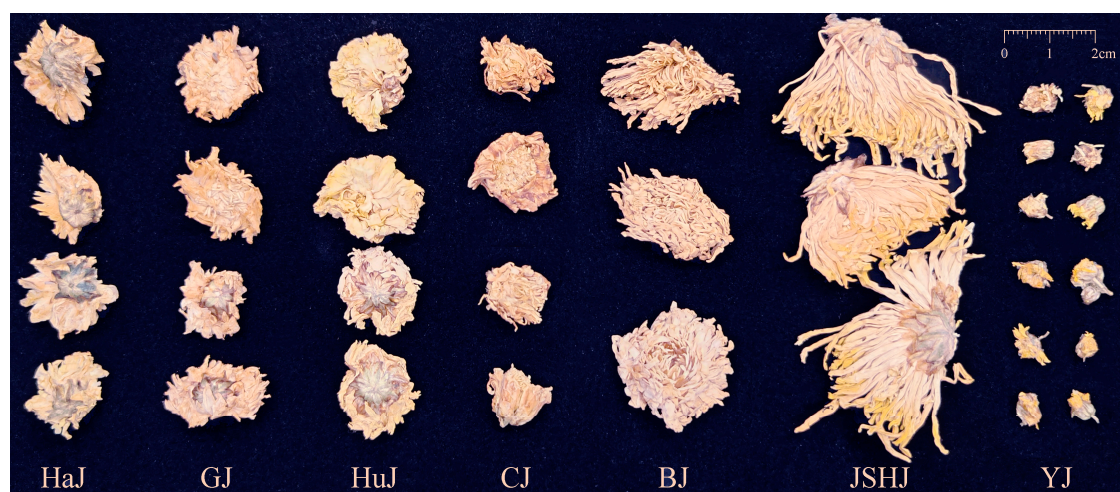

**Figure S1.** *Chrysanthemum* flowers commonly consumed as dietary herbal medicine in China.

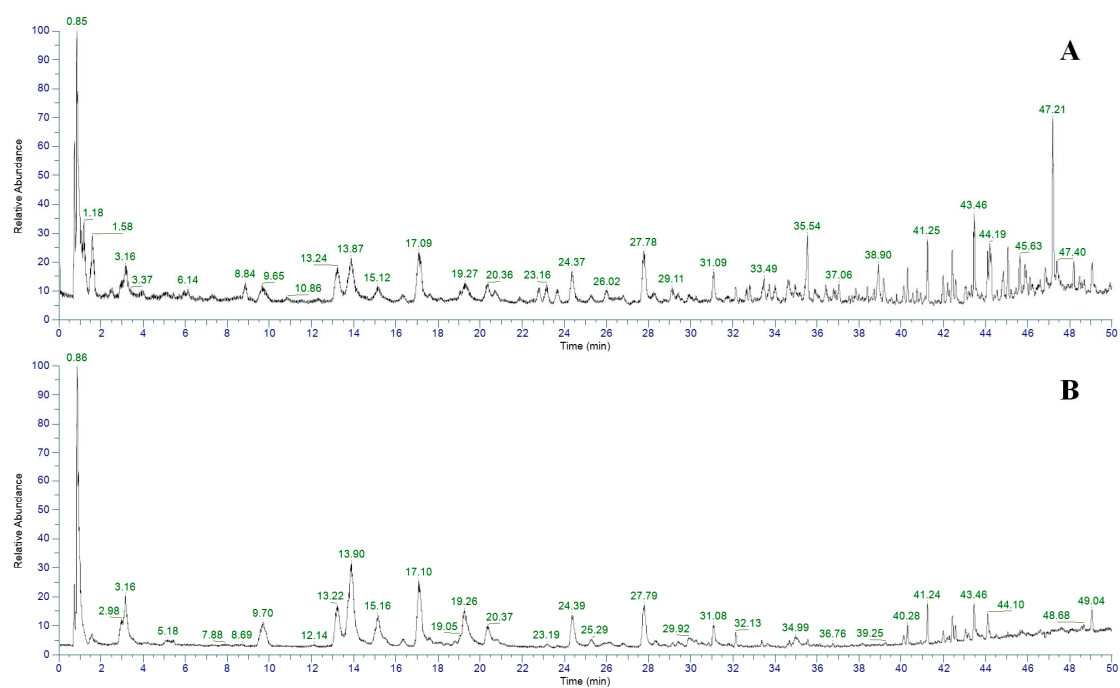

**Figure S2.** TIC chromatogram of the QC sample in positive (A) and negative (B) models.

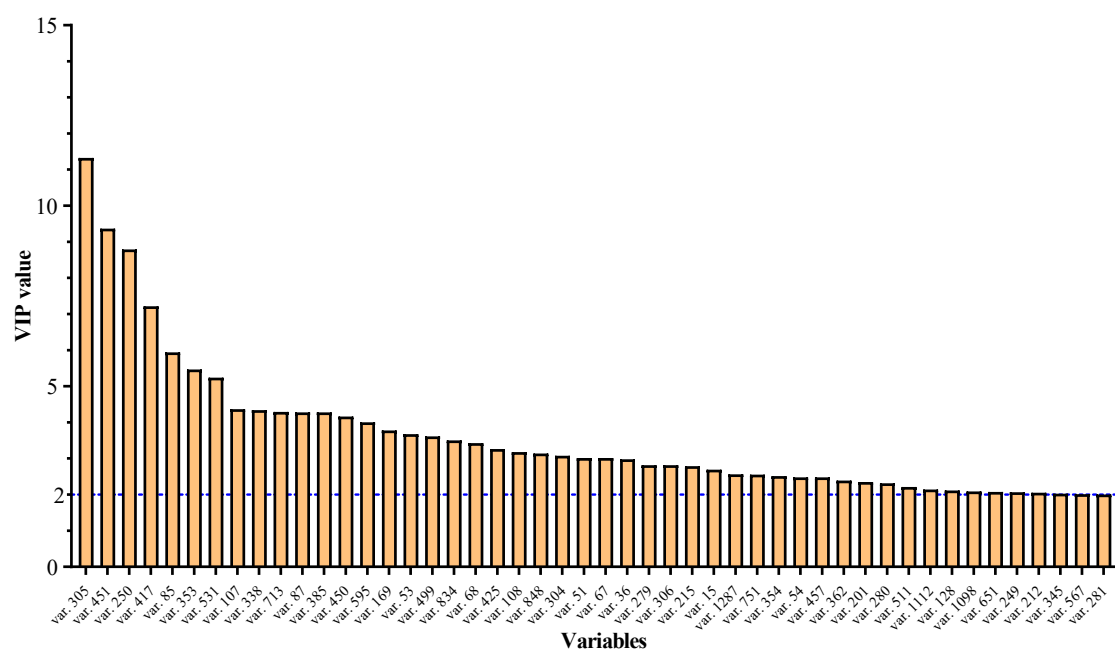

**Figure S3.** VIP value ( $\geq 2.0$ ) of the features.

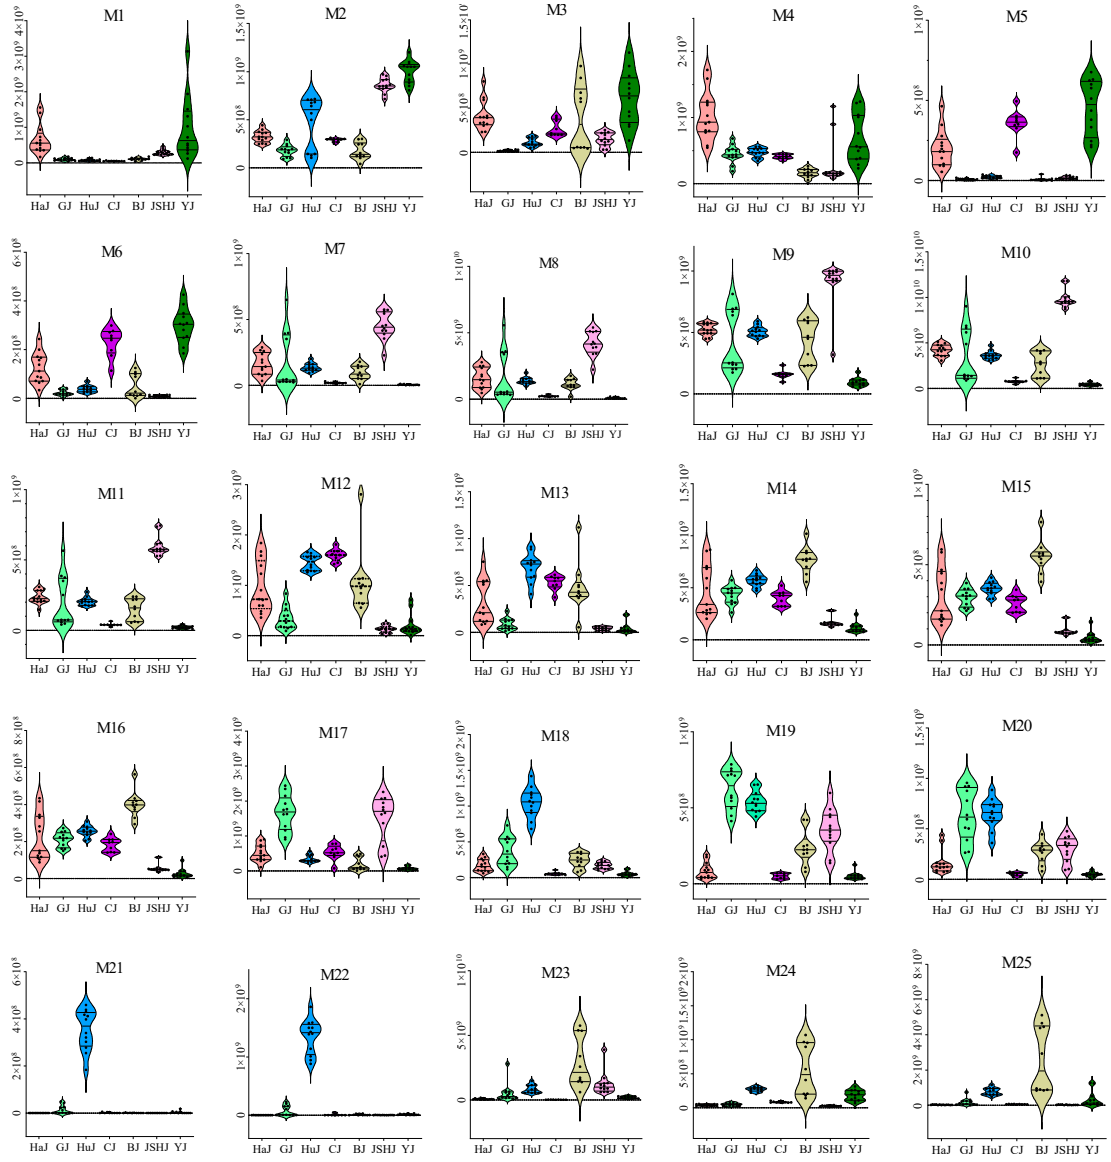

**Figure S4.** Violin plot of peak areas for top 25 features.

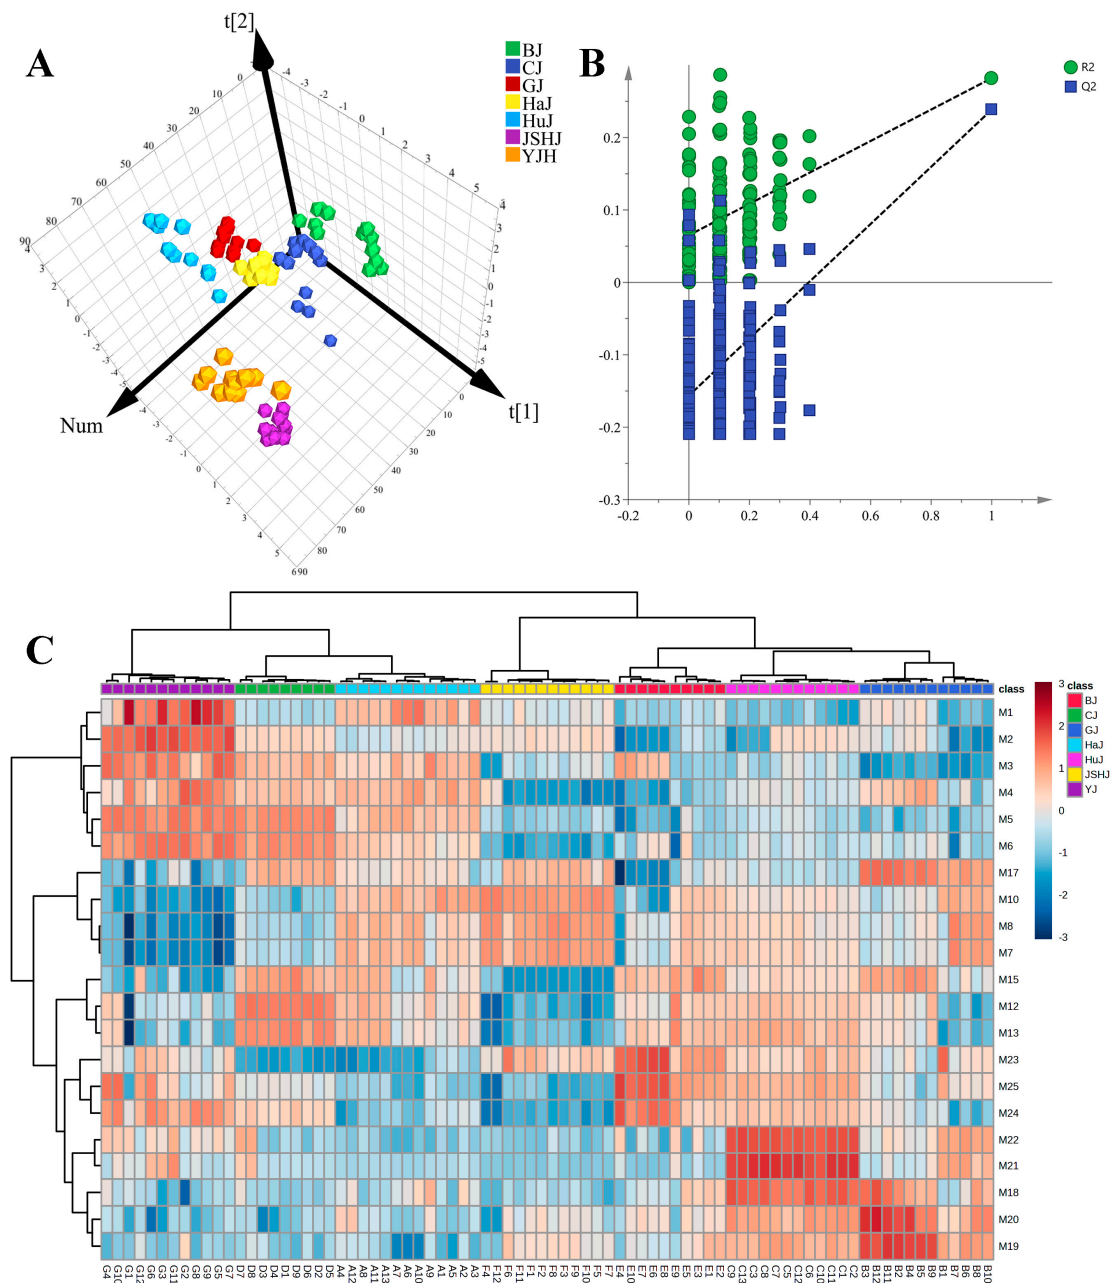

**Figure S5.** Multivariate statistic analysis of *Chrysanthemum* flowers with the 21 quality control markers. (A) PLS-DA score plot. (B) Cross-validation of the PLS-DA model with 200 permutation tests. (C) Heatmap with hierarchical clustering.

**Table S1.**LC-MS data of the compounds in *Chrysanthemum* flowers identified by the workflow.

| No. | RT<br>(min) | Molecular<br>formular                                         | Adduct             | Experimental<br><i>m/z</i> | Error<br>(ppm) | MS/MS fragment                                                                                                                 | Identification                                         | Class                  | Method               |
|-----|-------------|---------------------------------------------------------------|--------------------|----------------------------|----------------|--------------------------------------------------------------------------------------------------------------------------------|--------------------------------------------------------|------------------------|----------------------|
| 1   | 0.880       | C <sub>7</sub> H <sub>12</sub> O <sub>6</sub>                 | [M+H] <sup>+</sup> | 193.07059                  | -0.383         | 157.04979, 147.06552, 139.03896,<br>129.05446, 95.04911, 83.04912                                                              | Quinic acid                                            | Caffeoylquinic<br>acid | In-house<br>database |
| 2   | 0.887       | C <sub>10</sub> H <sub>13</sub> N <sub>5</sub> O <sub>4</sub> | [M+H] <sup>+</sup> | 268.10397                  | -0.223         | 229.03366, 136.06177, 119.03536,<br>94.04009, 85.02815, 69.03354,<br>57.03343                                                  | Adenosine                                              | Alkaloid               | mzCloud,<br>mzVault  |
| 3   | 0.966       | C <sub>10</sub> H <sub>13</sub> N <sub>5</sub> O <sub>3</sub> | [M+H] <sup>+</sup> | 252.10834                  | -3.075         | 229.01627, 136.06174, 119.03515,<br>117.05450, 99.04400, 73.02836                                                              | 2'-Deoxyadenosine                                      | Alkaloid               | mzCloud              |
| 4   | 1.032       | C <sub>10</sub> H <sub>13</sub> N <sub>5</sub> O <sub>5</sub> | [M+H] <sup>+</sup> | 284.09891                  | -0.121         | 229.03024, 203.08507, 167.05649,<br>152.05672, 135.03011, 128.03485,<br>110.03485, 109.05094, 55.02923                         | Guanosine                                              | Alkaloid               | mzVault              |
| 5   | 1.143       | C <sub>11</sub> H <sub>5</sub> N <sub>4</sub> O <sub>4</sub>  | [M+H] <sup>+</sup> | 282.11969                  | 0.036          | 250.12929, 229.03828, 209.09256,<br>204.11333, 202.05373, 168.06589,<br>136.06177, 119.03525, 101.05952,<br>85.02838, 69.03350 | 2'-O-Methyladenosine                                   | Alkaloid               | mzCloud              |
| 6   | 1.495       | C <sub>16</sub> H <sub>18</sub> O <sub>9</sub>                | [M+H] <sup>+</sup> | 355.10239                  | 0.091          | 163.03896, 145.02850, 135.04422,<br>117.03357, 107.04836, 91.05712,<br>89.03857                                                | 3-O-Caffeoyl quinic acid                               | Caffeoylquinic<br>acid | In-house<br>database |
| 7   | 1.502       | C <sub>17</sub> H <sub>20</sub> O <sub>9</sub>                | [M+H] <sup>+</sup> | 369.11578                  | -6.036         | 306.17062, 203.08522, 185.04144,<br>118.04967, 98.06026, 72.04449                                                              | Chlorogenic acid methyl ester                          | Caffeoylquinic<br>acid | In-house<br>database |
| 8   | 1.674       | C <sub>9</sub> H <sub>20</sub> N <sub>2</sub> O <sub>2</sub>  | [M+H] <sup>+</sup> | 189.15977                  | 0.087          | 144.10193, 102.05489, 74.02367,<br>58.06513                                                                                    | Propamocarb                                            | Others                 | mzCloud,<br>mzVault  |
| 9   | 1.761       | C <sub>10</sub> H <sub>11</sub> NO <sub>2</sub>               | [M+H] <sup>+</sup> | 178.08621                  | -0.251         | 133.08395, 132.08072, 130.06514,<br>119.07400, 117.05702, 105.06993,<br>91.05447, 79.05442, 88.02162,<br>72.93663, 56.96468    | D-1,2,3,4-Tetrahydroisoquinoline-3-<br>carboxylic acid | Alkaloid               | mzCloud              |
| 10  | 1.763       | C <sub>16</sub> H <sub>18</sub> O <sub>9</sub>                | [M+H] <sup>+</sup> | 355.10226                  | -0.275         | 203.08504, 163.03905, 145.02857,<br>135.04379, 117.03348, 107.03348,<br>91.05748, 89.03858                                     | 5-O-Caffeoyl quinic acid                               | Caffeoylquinic<br>acid | DPI                  |
| 11  | 1.843       | C <sub>21</sub> H <sub>20</sub> O <sub>13</sub>               | [M+H] <sup>+</sup> | 481.09736                  | -0.637         | 305.06470, 287.05383, 231.06491,<br>203.08493, 153.01822, 149.02344,<br>123.04400, 121.02869, 68.99733                         | Taxifolin-7-O-glucuronide                              | Flavanoid              | DPI                  |
| 12  | 1.902       | C <sub>11</sub> H <sub>12</sub> N <sub>2</sub> O <sub>2</sub> | [M+H] <sup>+</sup> | 205.09702                  | -0.651         | 188.07062, 170.06078, 159.06833,<br>149.02385, 146.05977, 144.08107,<br>132.08086, 118.06516, 117.05792,<br>91.05447, 65.03848 | DL-Tryptophan isomer                                   | Amino acid             | mzCloud,<br>mzVault  |

|                 |       |                                                               |                     |           |        |                                                                                                                               |                                                             |                     |                    |
|-----------------|-------|---------------------------------------------------------------|---------------------|-----------|--------|-------------------------------------------------------------------------------------------------------------------------------|-------------------------------------------------------------|---------------------|--------------------|
| 13              | 1.979 | C <sub>21</sub> H <sub>22</sub> O <sub>12</sub>               | [M+H] <sup>+</sup>  | 467.11810 | -0.646 | 305.06689, 287.05627, 259.05963, 231.06543, 203.08498, 153.01845, 149.02350, 123.04412, 121.02867, 68.99709                   | Taxifolin-3- <i>O</i> - $\beta$ -D-glucoside                | Flavanoid           | mzCloud            |
| 14              | 2.422 | C <sub>9</sub> H <sub>9</sub> N <sub>3</sub> O <sub>2</sub>   | [M+H] <sup>+</sup>  | 192.07671 | -0.222 | 160.05064, 132.05595, 105.04558, 58.96474, 53.17344                                                                           | Carbendazim                                                 | Others              | mzCloud, mzVault   |
| 15              | 2.460 | C <sub>11</sub> H <sub>12</sub> N <sub>2</sub> O <sub>2</sub> | [M+H] <sup>+</sup>  | 205.09705 | -0.505 | 188.07065, 170.06042, 146.06010, 118.06525, 91.05457, 74.02368                                                                | DL-Tryptophan                                               | Alkaloid            | mzCloud, mzVault   |
| 16              | 2.463 | C <sub>11</sub> H <sub>9</sub> NO <sub>2</sub>                | [M+H] <sup>+</sup>  | 188.07051 | -0.503 | 170.05974, 170.05974, 146.05991, 144.08072, 143.07286, 142.06485, 118.06496, 116.06115, 115.05404, 91.05412, 81.03374         | <i>trans</i> -3-Indoleacrylic acid                          | Alkaloid            | mzCloud            |
| 17 <sup>#</sup> | 3.178 | C <sub>16</sub> H <sub>18</sub> O <sub>9</sub>                | [M+H] <sup>+</sup>  | 355.10239 | 0.091  | 163.03897, 145.02869, 117.03342, 107.04913, 91.05775, 89.03856                                                                | Chlorogenic acid                                            | Caffeoylquinic acid | Reference standard |
| 18 <sup>#</sup> | 3.178 | C <sub>16</sub> H <sub>18</sub> O <sub>9</sub>                | [M+H] <sup>+</sup>  | 355.10239 | 0.091  | 163.03897, 145.02869, 117.03342, 107.04913, 91.05775, 89.03856                                                                | 4- <i>O</i> -Caffeoyl quinic acid                           | Caffeoylquinic acid | Reference standard |
| 19              | 3.253 | C <sub>17</sub> H <sub>24</sub> O <sub>9</sub>                | [M+Na] <sup>+</sup> | 395.13107 | -0.463 | 233.07880, 232.07083, 229.02667, 185.04144, 163.03960                                                                         | Syringin                                                    | Phenol              | mzCloud, mzVault   |
| 20              | 3.461 | C <sub>10</sub> H <sub>7</sub> NO <sub>3</sub>                | [M+H] <sup>+</sup>  | 190.04991 | 0.215  | 162.05493, 143.08536, 116.04971, 89.03902, 87.02861, 58.96474                                                                 | Kynurenic acid                                              | Amino acid          | mzCloud, mzVault   |
| 21              | 3.525 | C <sub>8</sub> H <sub>10</sub> N <sub>4</sub> O <sub>2</sub>  | [M+H] <sup>+</sup>  | 195.08763 | -0.111 | 163.03911, 138.06598, 117.03329, 110.07104, 89.03844, 83.06059, 69.04478                                                      | Caffeine                                                    | Alkaloid            | mzCloud            |
| 22              | 3.679 | C <sub>9</sub> H <sub>6</sub> O <sub>4</sub>                  | [M+H] <sup>+</sup>  | 179.03384 | -0.250 | 151.03900, 133.02846, 123.04391, 105.03336, 95.04897, 77.03819, 69.96318                                                      | Esculetin isomer                                            | Phenylpropanoid     | mzCloud, mzVault   |
| 23              | 3.683 | C <sub>27</sub> H <sub>30</sub> O <sub>17</sub>               | [M+H] <sup>+</sup>  | 627.15540 | -0.278 | 303.04993, 257.04529, 229.05226, 201.05708, 153.01787, 137.02379, 109.02872, 97.02866, 85.02839, 81.03352, 69.03374, 68.99718 | Quercetin-3,7-di- <i>O</i> - $\beta$ -D-glucopyranoside     | Flavanoid           | DPI                |
| 24              | 3.841 | C <sub>12</sub> H <sub>12</sub> N <sub>2</sub> O <sub>2</sub> | [M+H] <sup>+</sup>  | 217.09718 | 0.122  | 203.08493, 173.10765, 171.09163, 144.08084, 130.06523, 117.06998, 115.05449, 103.05434, 74.02387                              | 2,3,4,9-Tetrahydro-1H- $\beta$ -carboline-3-carboxylic acid | Alkaloid            | mzCloud            |
| 25 <sup>#</sup> | 4.236 | C <sub>9</sub> H <sub>18</sub> O <sub>6</sub>                 | [M+H] <sup>+</sup>  | 181.04961 | 0.415  | 203.08493, 163.03883, 145.02843, 135.04367, 117.03388, 105.03320, 95.04932, 89.03870                                          | Caffeic acid                                                | Caffeoylquinic acid | Reference standard |
| 26 <sup>#</sup> | 4.591 | C <sub>25</sub> H <sub>24</sub> O <sub>12</sub>               | [M+H] <sup>+</sup>  | 517.13397 | -0.158 | 375.00278, 229.01700, 163.03888, 154.02112, 145.02846, 135.04431, 117.03338, 98.51064, 89.03868                               | 1,3- <i>O</i> -Dicafeoyl quinic acid                        | Caffeoylquinic acid | Reference standard |



|     |       |                                                 |                     |           |        |                                                                                                                                            |                                                                |                     |                   |
|-----|-------|-------------------------------------------------|---------------------|-----------|--------|--------------------------------------------------------------------------------------------------------------------------------------------|----------------------------------------------------------------|---------------------|-------------------|
| 27  | 4.861 | C <sub>13</sub> H <sub>13</sub> N <sub>3</sub>  | [M+H] <sup>+</sup>  | 212.11821 | -0.063 | 195.09261, 119.06024, 105.04489, 95.04907, 94.05510, 92.04957                                                                              | N,N'-Diphenylguanidine                                         | Alkaloid            | mzCloud           |
| 28  | 5.181 | C <sub>16</sub> H <sub>18</sub> O <sub>9</sub>  | [M+H] <sup>+</sup>  | 355.10229 | -0.191 | 285.01050, 229.02301, 163.03917, 135.04424, 117.03479, 91.05743, 89.03874                                                                  | 1- <i>O</i> -Caffeoyl quinic acid                              | Caffeoylquinic acid | DPI               |
| 29* | 6.905 | C <sub>9</sub> H <sub>6</sub> O <sub>3</sub>    | [M+H] <sup>+</sup>  | 163.03889 | -0.492 | 135.04424, 119.04909, 107.04696, 89.03843, 55.93435                                                                                        | 7-Hydroxycoumarin                                              | Phenylpropanoid     | In-house database |
| 30  | 7.183 | C <sub>10</sub> H <sub>8</sub> O <sub>4</sub>   | [M+H] <sup>+</sup>  | 193.04953 | -0.025 | 178.02530, 150.03214, 133.02866, 122.03630                                                                                                 | Scopoletin                                                     | Others              | mzCloud           |
| 31  | 7.592 | C <sub>27</sub> H <sub>30</sub> O <sub>15</sub> | [M+H] <sup>+</sup>  | 595.16571 | -0.060 | 433.11340, 271.06006, 229.02722, 202.10086, 181.12959, 153.01804, 119.04931, 91.05642, 73.04674                                            | Apigenin-di- <i>O</i> -glucoside                               | Flavanoid           | DPI               |
| 32  | 8.009 | C <sub>27</sub> H <sub>30</sub> O <sub>16</sub> | [M+H] <sup>+</sup>  | 611.15979 | -1.424 | 449.10696, 355.07104, 348.53085, 287.05478, 241.04959, 229.04063, 161.02251, 153.01813, 135.04382, 117.03370, 91.05730, 89.03863           | Luteolin-7,4'-di- <i>O</i> - $\beta$ -D-glucopyranoside isomer | Flavanoid           | DPI               |
| 33  | 8.217 | C <sub>21</sub> H <sub>20</sub> O <sub>12</sub> | [M+H] <sup>+</sup>  | 465.10257 | -0.390 | 289.06992, 256.02100, 229.03424, 163.03864, 153.01825, 135.04381, 89.03860                                                                 | Eriodictyol-7-glucuronide isomer                               | Flavanoid           | DPI               |
| 34  | 8.496 | C <sub>13</sub> H <sub>20</sub> O <sub>5</sub>  | [M+Na] <sup>+</sup> | 279.12021 | -0.302 | 261.11014, 229.03433, 203.08499, 149.02332, 121.03954, 93.80418, 57.06984                                                                  | 1-Methyl-8-hydroxy-2,7-dimethyl-2,4-decadienedioate            | Others              | mzCloud           |
| 35* | 8.781 | C <sub>9</sub> H <sub>7</sub> NO                | [M+H] <sup>+</sup>  | 146.05998 | -0.411 | 118.06507, 91.05418, 84.95974, 69.07036, 56.96472, 55.50923                                                                                | Indole-3-aldehyde                                              | Alkaloid            | In-house database |
| 36  | 8.911 | C <sub>11</sub> H <sub>16</sub> O <sub>3</sub>  | [M+H] <sup>+</sup>  | 197.11722 | -0.001 | 179.10651, 161.09559, 135.11668, 133.10103, 107.08538, 105.06976, 95.04897, 91.05408, 81.06990, 67.05418                                   | Loliolide                                                      | Others              | mzVault           |
| 37* | 9.289 | C <sub>9</sub> H <sub>6</sub> O <sub>4</sub>    | [M+H] <sup>+</sup>  | 179.03374 | -0.809 | 161.02306, 155.03374, 151.03842, 137.02319, 133.02855, 111.04400, 105.03323, 91.01781, 81.03336, 68.99706, 67.01778                        | 5,7-Dihydroxychromone                                          | Phenylpropanoid     | In-house database |
| 38  | 9.717 | C <sub>21</sub> H <sub>22</sub> O <sub>11</sub> | [M+H] <sup>+</sup>  | 451.12320 | -0.636 | 289.07059, 229.04878, 203.08502, 163.03891, 153.01816, 135.04390, 89.03844, 68.99709, 67.01785                                             | Eriodictyol-7- <i>O</i> - $\beta$ -D-glucopyranoside           | Flavanoid           | In-house database |
| 39  | 9.744 | C <sub>15</sub> H <sub>10</sub> O <sub>6</sub>  | [M+H] <sup>+</sup>  | 287.05450 | -1.791 | 269.04544, 259.06000, 245.04356, 217.04921, 213.05426, 203.08630, 153.01807, 133.02821, 119.04899, 105.03339, 91.05339, 77.03843, 68.99709 | Kaempferol                                                     | Flavanoid           | DPI               |

|                 |        |                                                 |                                     |           |        |                                                                                                                                                                    |                                                                                   |                     |                    |
|-----------------|--------|-------------------------------------------------|-------------------------------------|-----------|--------|--------------------------------------------------------------------------------------------------------------------------------------------------------------------|-----------------------------------------------------------------------------------|---------------------|--------------------|
| 40              | 9.765  | C <sub>21</sub> H <sub>20</sub> O <sub>12</sub> | [M+H] <sup>+</sup>                  | 465.10245 | -0.649 | 289.07256, 271.05939, 163.03888, 153.01816, 117.03330, 135.04391, 89.03847, 68.99712, 67.01781                                                                     | Eriodictyol-7-glucuronide isomer                                                  | Flavanoid           | DPI                |
| 41              | 10.924 | C <sub>21</sub> H <sub>20</sub> O <sub>10</sub> | [M+H] <sup>+</sup>                  | 433.11276 | -0.375 | 415.10226, 397.09137, 367.08167, 337.07620, 313.07050, 283.06143, 271.05911, 229.02533, 202.10060                                                                  | Vitexin                                                                           | Flavanoid           | mzCloud            |
| 42              | 11.017 | C <sub>21</sub> H <sub>18</sub> O <sub>13</sub> | [M+H] <sup>+</sup>                  | 479.08176 | -0.535 | 423.03726, 303.04996, 229.04666, 203.08505, 153.01825, 137.02371, 121.02944, 111.00748, 68.99711                                                                   | Quercetin-3- <i>O</i> - $\beta$ -D-glucuronide                                    | Flavanoid           | mzCloud            |
| 43              | 11.066 | C <sub>21</sub> H <sub>20</sub> O <sub>12</sub> | [M+H] <sup>+</sup>                  | 465.10242 | -0.713 | 303.04999, 289.07083, 285.04105, 229.04884, 203.08499, 165.10835, 153.01833, 137.02342, 85.05032, 68.99722                                                         | Quercetin-7- <i>O</i> - $\beta$ -D-glucoside                                      | Flavanoid           | DPI                |
| 44              | 11.311 | C <sub>27</sub> H <sub>30</sub> O <sub>16</sub> | [M+H] <sup>+</sup>                  | 611.15979 | -1.424 | 449.10724, 355.07013, 339.45111, 287.05490, 229.03203, 153.01831, 143.09698, 135.04407, 91.05750, 73.04700                                                         | Luteolin 7,4'- <i>O</i> - $\beta$ -D-glucopyranoside isomer                       | Flavanoid           | DPI                |
| 45              | 11.501 | C <sub>27</sub> H <sub>28</sub> O <sub>17</sub> | [M+H] <sup>+</sup>                  | 625.13953 | -0.631 | 449.10773, 287.05493, 229.03595, 153.01762, 135.04463                                                                                                              | Luteolin-7- <i>O</i> - $\beta$ -D-glucuronide-3'- <i>O</i> - $\beta$ -D-glucoside | Flavanoid           | DPI                |
| 46              | 11.977 | C <sub>28</sub> H <sub>32</sub> O <sub>16</sub> | [M+H] <sup>+</sup>                  | 625.17621 | -0.160 | 463.12381, 381.06665, 301.07053, 286.04657, 258.05252, 65.98667                                                                                                    | Diosmetin-di- <i>O</i> -glucoside isomer                                          | Flavanoid           | DPI                |
| 47              | 12.315 | C <sub>25</sub> H <sub>24</sub> O <sub>12</sub> | [M+Na] <sup>+</sup>                 | 539.11597 | -0.049 | 377.08536, 331.07932, 197.04156, 185.02176, 163.03943                                                                                                              | Dicaffeoyl quinic acid isomer                                                     | Caffeoylquinic acid | In-house database  |
| 48              | 12.795 | C <sub>20</sub> H <sub>22</sub> O <sub>6</sub>  | [M-H <sub>2</sub> O+H] <sup>+</sup> | 341.13834 | -0.028 | 323.12720, 291.10107, 271.09729, 263.10605, 229.02470, 187.07594, 137.05974                                                                                        | Clemaphenol A isomer                                                              | Lignan              | mzCloud            |
| 49              | 12.956 | C <sub>21</sub> H <sub>20</sub> O <sub>10</sub> | [M+H] <sup>+</sup>                  | 433.11261 | -0.721 | 379.08252, 337.07184, 313.07175, 283.05994, 271.05963, 203.08519, 165.01686, 121.02898                                                                             | Isovitexin                                                                        | Flavanoid           | mzCloud, mzVault   |
| 50 <sup>#</sup> | 13.201 | C <sub>21</sub> H <sub>18</sub> O <sub>12</sub> | [M+H] <sup>+</sup>                  | 463.08682 | -0.608 | 287.05487, 269.04379, 241.04924, 229.03900, 213.05444, 203.03415, 179.03360, 171.02832, 161.02264, 153.01826, 137.02319, 135.04413, 117.03323, 115.05326, 89.03847 | Luteolin-7- <i>O</i> - $\beta$ -D-glucuronide                                     | Flavanoid           | Reference standard |
| 51              | 13.206 | C <sub>15</sub> H <sub>12</sub> O <sub>6</sub>  | [M+H] <sup>+</sup>                  | 289.07065 | -0.049 | 202.09966, 171.02806, 163.03932, 153.01801, 135.04428, 68.99718                                                                                                    | Eriodictyol isomer                                                                | Flavanoid           | mzCloud, mzVault   |

|                       |        |                                                 |                     |           |        |                                                                                                                                                                                                    |                                                        |                     |                    |
|-----------------------|--------|-------------------------------------------------|---------------------|-----------|--------|----------------------------------------------------------------------------------------------------------------------------------------------------------------------------------------------------|--------------------------------------------------------|---------------------|--------------------|
| <b>52<sup>#</sup></b> | 13.313 | C <sub>21</sub> H <sub>20</sub> O <sub>11</sub> | [M+H] <sup>+</sup>  | 449.10747 | -0.817 | 449.1073, 287.05472, 269.04446, 241.04936, 179.03383, 171.02838, 161.02307, 153.01810, 137.02303, 135.04396, 117.03295, 107.04903, 89.03854, 67.01778                                              | Luteolin-7- <i>O</i> - $\beta$ -D-glucopyranoside      | Flavanoid           | Reference standard |
| <b>53</b>             | 13.649 | C <sub>25</sub> H <sub>24</sub> O <sub>12</sub> | [M+Na] <sup>+</sup> | 539.11450 | -2.776 | 521.10339, 377.08334, 359.07114, 229.04187, 215.05254, 163.03958, 135.04456, 89.03857                                                                                                              | Dicaffeoyl quinic acid isomer                          | Caffeoylquinic acid | DPI                |
| <b>54</b>             | 13.771 | C <sub>21</sub> H <sub>22</sub> O <sub>10</sub> | [M+H] <sup>+</sup>  | 435.12851 | -0.143 | 409.16553, 273.07590, 229.03104, 153.01825, 147.04396, 119.04915, 91.05437, 69.03345                                                                                                               | Naringenin 7- <i>O</i> - $\beta$ -D-glucopyranoside    | Flavanoid           | DPI                |
| <b>55<sup>#</sup></b> | 13.867 | C <sub>25</sub> H <sub>24</sub> O <sub>12</sub> | [M+Na] <sup>+</sup> | 539.11493 | -1.978 | 521.10559, 493.10794, 377.08417, 359.07379, 331.07889, 215.05260, 203.03229, 197.04128, 185.02097, 179.03185, 163.03900, 145.02867, 135.04401, 117.03346, 89.03851                                 | 3,4- <i>O</i> -Dicaffeoylquinic acid                   | Caffeoylquinic acid | Reference standard |
| <b>56<sup>#</sup></b> | 13.867 | C <sub>25</sub> H <sub>24</sub> O <sub>12</sub> | [M+Na] <sup>+</sup> | 539.11493 | -1.978 | 521.10559, 493.10794, 377.08417, 359.07379, 331.07889, 215.05260, 203.03229, 197.04128, 185.02097, 179.03185, 163.03900, 145.02867, 135.04401, 117.03346, 89.03851                                 | 3,5- <i>O</i> -Dicaffeoylquinic acid                   | Caffeoylquinic acid | Reference standard |
| <b>57</b>             | 13.973 | C <sub>27</sub> H <sub>30</sub> O <sub>15</sub> | [M+H] <sup>+</sup>  | 595.16559 | -0.261 | 449.10739, 287.05481, 269.04492, 259.05997, 241.04985, 229.02551, 213.05441, 203.03560, 185.06009, 163.03903, 161.02309, 153.01822, 135.04402, 117.03361, 107.04896, 107.04896, 91.05715, 89.03848 | Luteolin-7- <i>O</i> -rutinoside                       | Flavanoid           | In-house database  |
| <b>58</b>             | 14.013 | C <sub>22</sub> H <sub>22</sub> O <sub>12</sub> | [M+H] <sup>+</sup>  | 479.11832 | -0.170 | 317.06570, 302.04221, 274.04703, 228.04108, 203.03409, 153.01865, 112.93604                                                                                                                        | Isorhamnetin-3- <i>O</i> - $\beta$ -D-glucoside isomer | Flavanoid           | DPI                |
| <b>59</b>             | 14.105 | C <sub>15</sub> H <sub>10</sub> O <sub>7</sub>  | [M+H] <sup>+</sup>  | 303.04993 | 0.005  | 285.03888, 257.04510, 229.05206, 203.08522, 163.03883, 153.01822, 137.02310, 135.04413, 98.25043, 89.03864, 68.99725                                                                               | Quercetin                                              | Flavanoid           | DPI                |
| <b>60<sup>*</sup></b> | 14.107 | C <sub>21</sub> H <sub>20</sub> O <sub>12</sub> | [M+H] <sup>+</sup>  | 465.10257 | -0.390 | 303.04987, 287.05411, 257.04645, 229.04630, 201.05435, 165.01874, 153.01833, 137.02391, 105.03407, 97.02866, 85.02832, 81.03356, 69.03359                                                          | Quercetin-3- <i>O</i> - $\beta$ -D-glucoside           | Flavanoid           | DPI                |

|                       |        |                                                 |                                     |           |        |                                                                                                              |                                                                                                |                     |                    |
|-----------------------|--------|-------------------------------------------------|-------------------------------------|-----------|--------|--------------------------------------------------------------------------------------------------------------|------------------------------------------------------------------------------------------------|---------------------|--------------------|
| <b>61</b>             | 14.125 | C <sub>26</sub> H <sub>28</sub> O <sub>15</sub> | [M+H] <sup>+</sup>                  | 581.14984 | -0.440 | 287.05502, 229.02748, 163.03836, 135.04431, 117.03390, 89.03920                                              | Luteolin 7- <i>O</i> - $\beta$ -D-apiofuranosyl(1 $\rightarrow$ 6)- $\beta$ -D-glucopyranoside | Flavanoid           | In-house database  |
| <b>62</b>             | 14.214 | C <sub>15</sub> H <sub>12</sub> O <sub>6</sub>  | [M+H] <sup>+</sup>                  | 289.07071 | 0.159  | 229.02271, 163.03920, 153.01813, 89.03861                                                                    | Eriodictyol isomer                                                                             | Flavanoid           | mzCloud, mzVault   |
| <b>63</b>             | 14.314 | C <sub>20</sub> H <sub>17</sub> NO <sub>4</sub> | [M+H] <sup>+</sup>                  | 336.12302 | -0.041 | 321.09692, 320.09149, 318.07709, 306.07553, 304.09769, 292.09680, 278.08139, 163.03908, 54.06162             | Berberine                                                                                      | Alkaloid            | mzCloud, mzVault   |
| <b>64<sup>#</sup></b> | 14.340 | C <sub>27</sub> H <sub>30</sub> O <sub>16</sub> | [M+H] <sup>+</sup>                  | 611.16028 | -0.622 | 378.13904, 303.04971, 229.04134, 203.08502, 142.55116, 91.05709, 85.02854, 78.04811, 71.04935                | Rutin                                                                                          | Flavanoid           | Reference standard |
| <b>65</b>             | 14.443 | C <sub>10</sub> H <sub>10</sub> O <sub>4</sub>  | [M-H <sub>2</sub> O+H] <sup>+</sup> | 177.05458 | -0.227 | 133.06516, 121.06461, 91.05453                                                                               | <i>trans</i> -2-Hydroxy-4-methoxycinnamic acid                                                 | Phenylpropanoid     | mzCloud            |
| <b>66*</b>            | 14.673 | C <sub>15</sub> H <sub>12</sub> O <sub>6</sub>  | [M+Na] <sup>+</sup>                 | 573.19440 | 0.268  | 411.13992, 229.02473, 188.54146, 185.04213, 165.56549, 151.36424, 88.24728                                   | Medioresinol 4- <i>O</i> - $\beta$ -D-glucopyranoside                                          | Lignan              | In-house database  |
| <b>67</b>             | 14.786 | C <sub>22</sub> H <sub>26</sub> O <sub>8</sub>  | [M+H] <sup>+</sup>                  | 419.17041 | 0.875  | 229.01736, 203.08498, 149.02318                                                                              | Syringaresinol                                                                                 | Lignan              | In-house database  |
| <b>68</b>             | 14.789 | C <sub>28</sub> H <sub>36</sub> O <sub>13</sub> | [M+Na] <sup>+</sup>                 | 603.20477 | -0.068 | 572.18286, 457.28448, 441.15158, 425.12344, 339.11108, 309.09253, 229.03435, 202.05363, 185.04152, 163.03911 | Syringaresinol-4- <i>O</i> - $\beta$ -D-monoglucoside                                          | Lignan              | mzCloud            |
| <b>69<sup>#</sup></b> | 15.099 | C <sub>25</sub> H <sub>24</sub> O <sub>12</sub> | [M+H] <sup>+</sup>                  | 517.13367 | -0.738 | 337.09283, 319.08026, 229.03595, 163.03897, 145.02834, 135.04405, 117.03335, 107.04913, 95.04906, 89.03851   | 1,5- <i>O</i> -Dicafeoyl quinic acid                                                           | Caffeoylquinic acid | Reference standard |
| <b>70</b>             | 15.434 | C <sub>12</sub> H <sub>13</sub> N <sub>3</sub>  | [M+H] <sup>+</sup>                  | 200.11819 | -0.167 | 107.06015, 92.29779, 82.06503, 74.09651, 69.06992, 60.06652, 57.06966, 55.05416                              | Pyrimethanil                                                                                   | Alkaloid            | mzCloud            |
| <b>71</b>             | 15.967 | C <sub>24</sub> H <sub>22</sub> O <sub>15</sub> | [M+H] <sup>+</sup>                  | 551.10297 | -0.318 | 326.09888, 303.05026, 229.03618, 202.04219, 109.02863, 85.02843, 81.03362, 74.16686, 69.03333                | Quercetin-3- <i>O</i> -malonylglucoside isomer                                                 | Flavanoid           | DPI                |
| <b>72</b>             | 16.264 | C <sub>26</sub> H <sub>28</sub> O <sub>14</sub> | [M+H] <sup>+</sup>                  | 565.15527 | 0.158  | 271.05975, 203.08496, 153.01784, 119.04877                                                                   | Apiin isomer                                                                                   | Flavanoid           | mzCloud, mzVault   |
| <b>73</b>             | 16.352 | C <sub>24</sub> H <sub>24</sub> O <sub>14</sub> | [M+H] <sup>+</sup>                  | 537.12354 | -0.635 | 289.07077, 203.08510, 171.02878, 163.03906, 153.01826, 135.04399, 89.03857, 83.01261, 68.99717, 67.01786     | Eriodictyol-7- <i>O</i> -(6"-malonylglucoside) isomer                                          | Flavanoid           | DPI                |

|                 |        |                                                 |                     |           |        |                                                                                                                                                                             |                                                       |           |                    |
|-----------------|--------|-------------------------------------------------|---------------------|-----------|--------|-----------------------------------------------------------------------------------------------------------------------------------------------------------------------------|-------------------------------------------------------|-----------|--------------------|
| 74              | 16.511 | C <sub>28</sub> H <sub>32</sub> O <sub>16</sub> | [M+H] <sup>+</sup>  | 625.17578 | -0.848 | 463.07968, 359.06610, 301.06995, 286.04657, 258.05161, 229.04866, 153.01776, 85.02818                                                                                       | Diosmetin-di- <i>O</i> -glucoside isomer              | Flavanoid | DPI                |
| 75              | 16.541 | C <sub>22</sub> H <sub>24</sub> O <sub>11</sub> | [M+H] <sup>+</sup>  | 465.13879 | -0.746 | 465.13879, 303.08624, 285.07571, 177.05455, 163.03877, 153.01817, 149.05960, 135.04385, 117.03336, 89.03849, 67.01785                                                       | Hesperetin-7- <i>O</i> - $\beta$ -D-glucopyranoside   | Flavanoid | DPI                |
| 76              | 16.634 | C <sub>15</sub> H <sub>12</sub> O <sub>6</sub>  | [M+H] <sup>+</sup>  | 289.07037 | -1.017 | 229.03488, 171.02906, 163.03885, 153.01839, 135.04442                                                                                                                       | Eriodictyol isomer                                    | Flavanoid | mzCloud            |
| 77              | 16.662 | C <sub>31</sub> H <sub>42</sub> O <sub>17</sub> | [M+Na] <sup>+</sup> | 709.23083 | -0.831 | 677.20532, 547.17834, 531.18286, 515.15234, 473.14069, 445.14880, 323.10544, 286.12051, 229.03340, 165.05466, 121.06467, 95.04906                                           | Nuzhenide                                             | Others    | mzVault            |
| 78              | 17.171 | C <sub>24</sub> H <sub>22</sub> O <sub>14</sub> | [M+H] <sup>+</sup>  | 535.10773 | -0.936 | 499.12021, 463.10306, 433.09232, 409.09372, 287.05472, 163.03992, 153.01837, 135.04451, 89.03836                                                                            | Luteolin-7- <i>O</i> -(6"-malonylglucoside) isomer    | Flavanoid | DPI                |
| 79 <sup>#</sup> | 17.197 | C <sub>21</sub> H <sub>20</sub> O <sub>10</sub> | [M+H] <sup>+</sup>  | 433.11258 | -0.791 | 271.06003, 243.06487, 229.04843, 203.08511, 171.02910, 163.03928, 153.01814, 145.02826, 119.04900, 91.05417, 68.99722, 67.01775                                             | Apigenin-7- <i>O</i> - $\beta$ -D-glucoside           | Flavanoid | Reference standard |
| 80              | 17.394 | C <sub>21</sub> H <sub>18</sub> O <sub>11</sub> | [M+H] <sup>+</sup>  | 447.09195 | -0.530 | 271.05997, 153.01814, 119.04901, 91.05386, 68.99703, 67.01784                                                                                                               | Apigenin-7- <i>O</i> -glucuronide                     | Flavanoid | In-house database  |
| 81              | 17.699 | C <sub>26</sub> H <sub>28</sub> O <sub>14</sub> | [M+H] <sup>+</sup>  | 565.15509 | -0.161 | 271.06024, 229.02748, 153.01857, 119.04884, 91.05435                                                                                                                        | Apiin isomer                                          | Flavanoid | mzCloud, mzVault   |
| 82 <sup>#</sup> | 17.705 | C <sub>27</sub> H <sub>30</sub> O <sub>14</sub> | [M+H] <sup>+</sup>  | 579.17072 | -0.191 | 535.35760, 433.11292, 271.06000, 243.06567, 229.04459, 225.05382, 203.08601, 171.02873, 153.01819, 145.02809, 121.02827, 119.04901, 91.015402, 85.02836, 68.99708, 67.01781 | Apigenin-7- <i>O</i> -rutinoside                      | Flavanoid | Reference standard |
| 83              | 17.908 | C <sub>24</sub> H <sub>22</sub> O <sub>15</sub> | [M+H] <sup>+</sup>  | 551.10303 | -0.209 | 303.05026, 229.05151, 215.27277, 153.01875, 116.92359, 109.02875, 74.75243, 68.99741                                                                                        | Quercetin-3- <i>O</i> -malonylglucoside isomer        | Flavanoid | DPI                |
| 84              | 17.991 | C <sub>22</sub> H <sub>22</sub> O <sub>11</sub> | [M+H] <sup>+</sup>  | 463.12335 | -0.296 | 301.07034, 285.04688, 258.05188, 229.04942, 203.08501, 153.01804, 68.99702                                                                                                  | Diosmetin-7- <i>O</i> - $\beta$ -D-glucoside isomer   | Flavanoid | DPI                |
| 85              | 18.108 | C <sub>22</sub> H <sub>20</sub> O <sub>12</sub> | [M+H] <sup>+</sup>  | 477.10236 | -0.821 | 301.07208, 286.04681, 258.05194, 229.04912, 153.01811, 106.04111                                                                                                            | Diosmetin-7- <i>O</i> - $\beta$ -D-glucuronide isomer | Flavanoid | DPI                |

|                       |        |                                                 |                                     |           |        |                                                                                                                                                         |                                                        |                     |                    |
|-----------------------|--------|-------------------------------------------------|-------------------------------------|-----------|--------|---------------------------------------------------------------------------------------------------------------------------------------------------------|--------------------------------------------------------|---------------------|--------------------|
| <b>86</b>             | 18.158 | C <sub>23</sub> H <sub>24</sub> O <sub>12</sub> | [M+H] <sup>+</sup>                  | 493.13370 | -0.713 | 331.08121, 315.05008, 287.05533, 285.04047, 270.05243, 242.05763, 229.04712, 153.01875, 139.06761                                                       | Tricin-5- <i>O</i> - $\beta$ -D-glucoside              | Flavanoid           | mzCloud, mzVault   |
| <b>87</b>             | 18.242 | C <sub>21</sub> H <sub>20</sub> O <sub>11</sub> | [M+Na] <sup>+</sup>                 | 471.08942 | -0.768 | 309.03784, 308.03021, 229.03629, 129.02454, 69.17618, 53.04523                                                                                          | Kaempferol-3- <i>O</i> -glucoside                      | Flavanoid           | mzVault            |
| <b>88</b>             | 18.367 | C <sub>25</sub> H <sub>24</sub> O <sub>12</sub> | [M+Na] <sup>+</sup>                 | 539.11713 | 2.102  | 377.08331, 359.07388, 203.08498, 163.03896                                                                                                              | Dicaffeoyl quinic acid isomer                          | Caffeoylquinic acid | In-house database  |
| <b>89</b>             | 18.757 | C <sub>21</sub> H <sub>20</sub> O <sub>11</sub> | [M+H] <sup>+</sup>                  | 449.10760 | -0.528 | 287.05515, 241.05103, 229.02478, 153.01814, 135.04413, 117.03382, 89.03846, 68.99725                                                                    | Kaempferol-7- <i>O</i> - $\beta$ -D-glucoside          | Flavanoid           | DPI                |
| <b>90*</b>            | 18.894 | C <sub>15</sub> H <sub>12</sub> O <sub>6</sub>  | [M+H] <sup>+</sup>                  | 289.07071 | 0.159  | 271.06088, 229.02805, 187.03931, 179.03381, 163.03894, 153.01820, 145.02843, 135.04404, 117.03349, 89.03854, 69.03352, 65.03849                         | Eriodictyol                                            | Flavanoid           | In-house database  |
| <b>91</b>             | 18.924 | C <sub>22</sub> H <sub>22</sub> O <sub>12</sub> | [M+H] <sup>+</sup>                  | 479.11823 | -0.358 | 317.06534, 302.04150, 229.02179, 153.01909, 85.02847                                                                                                    | Isorhamnetin-3- <i>O</i> - $\beta$ -D-glucoside isomer | Flavanoid           | DPI                |
| <b>92</b>             | 19.155 | C <sub>22</sub> H <sub>22</sub> O <sub>11</sub> | [M+H] <sup>+</sup>                  | 463.12317 | -0.685 | 301.07019, 286.04672, 258.05182, 229.04846, 153.01793, 106.04081, 59.89636                                                                              | Diosmetin-7- <i>O</i> - $\beta$ -D-glucoside isomer    | Flavanoid           | DPI                |
| <b>93<sup>#</sup></b> | 19.203 | C <sub>25</sub> H <sub>24</sub> O <sub>12</sub> | [M+Na] <sup>+</sup>                 | 539.11530 | -1.292 | 521.10864, 377.08453, 359.07425, 331.08014, 229.02928, 215.05272, 203.03316, 197.04230, 185.02126, 163.03899, 135.04416, 117.03347, 107.04958, 89.03858 | 4,5- <i>O</i> -Dicaffeoyl quinic acid                  | Caffeoylquinic acid | Reference standard |
| <b>94</b>             | 19.314 | C <sub>22</sub> H <sub>20</sub> O <sub>12</sub> | [M+H] <sup>+</sup>                  | 477.10236 | -0.821 | 301.07071, 286.04718, 258.05222, 229.04846, 153.00354, 67.01743                                                                                         | Diosmetin-7- <i>O</i> - $\beta$ -D-glucuronide isomer  | Flavanoid           | In-house database  |
| <b>95</b>             | 19.454 | C <sub>28</sub> H <sub>32</sub> O <sub>15</sub> | [M+Na] <sup>+</sup>                 | 631.16357 | 0.364  | 331.101032, 323.05331, 229.03412, 241.50797, 203.08514                                                                                                  | Neodiosmin                                             | Flavanoid           | mzCloud            |
| <b>96</b>             | 19.459 | C <sub>28</sub> H <sub>32</sub> O <sub>15</sub> | [M+H] <sup>+</sup>                  | 609.18115 | -0.403 | 463.12259, 301.07037, 286.04691, 258.05197, 229.04942, 153.01808, 71.04916                                                                              | Diosmetin-7- <i>O</i> -rutinoside                      | Flavanoid           | In-house database  |
| <b>97</b>             | 19.698 | C <sub>24</sub> H <sub>24</sub> O <sub>14</sub> | [M+H] <sup>+</sup>                  | 537.12384 | -0.076 | 289.07037, 229.04276, 163.03951, 153.01834, 127.03886, 109.02830, 97.02860, 89.03859, 85.02864, 81.03383, 69.03351                                      | Eriodictyol-7- <i>O</i> -(6"-malonylglucoside) isomer  | Flavanoid           | DPI                |
| <b>98</b>             | 20.356 | C <sub>20</sub> H <sub>22</sub> O <sub>6</sub>  | [M-H <sub>2</sub> O+H] <sup>+</sup> | 341.13837 | 0.060  | 291.10150, 271.09595, 229.03763, 219.08009, 203.08498, 137.06009                                                                                        | Clemaphenol A isomer                                   | Lignan              | mzCloud            |

|                        |        |                                                 |                     |           |        |                                                                                                                                 |                                                                                    |                 |                    |
|------------------------|--------|-------------------------------------------------|---------------------|-----------|--------|---------------------------------------------------------------------------------------------------------------------------------|------------------------------------------------------------------------------------|-----------------|--------------------|
| <b>99<sup>#</sup></b>  | 20.427 | C <sub>24</sub> H <sub>22</sub> O <sub>14</sub> | [M+H] <sup>+</sup>  | 535.10803 | -0.375 | 392.05762, 287.05472, 241.05022, 171.02875, 161.02306, 153.01825, 137.02339, 135.04407, 89.03857, 67.01780                      | Luteolin-7- <i>O</i> -(6"-malonylglucoside)                                        | Flavanoid       | Reference standard |
| <b>100</b>             | 20.628 | C <sub>24</sub> H <sub>22</sub> O <sub>13</sub> | [M+H] <sup>+</sup>  | 519.11353 | 0.412  | 413.06398, 299.06519, 271.06021, 163.03909, 153.01854, 119.04955, 91.05429, 73.04720                                            | Apigenin-7- <i>O</i> -malonylglucoside isomer                                      | Flavanoid       | DPI                |
| <b>101</b>             | 20.677 | C <sub>15</sub> H <sub>12</sub> O <sub>6</sub>  | [M+H] <sup>+</sup>  | 289.07062 | -0.152 | 229.03966, 202.10075, 180.10504, 169.55893, 163.03944, 153.01822                                                                | Eriodictyol isomer                                                                 | Flavanoid       | mzCloud, mzVault   |
| <b>102</b>             | 20.884 | C <sub>24</sub> H <sub>22</sub> O <sub>13</sub> | [M+H] <sup>+</sup>  | 519.11322 | -0.185 | 299.06247, 271.06012, 229.02782, 153.01810, 119.04888, 91.05378, 68.99718, 67.01790                                             | Apigenin-7- <i>O</i> -malonylglucoside isomer                                      | Flavanoid       | DPI                |
| <b>103</b>             | 21.823 | C <sub>21</sub> H <sub>20</sub> O <sub>11</sub> | [M+H] <sup>+</sup>  | 449.10760 | -0.528 | 373.22379, 359.12134, 287.05487, 202.10085, 202.05412, 153.01849, 135.70399, 121.01031                                          | Luteolin-4'- <i>O</i> -glucoside                                                   | Flavanoid       | mz Cloud, mz Vault |
| <b>104</b>             | 22.182 | C <sub>22</sub> H <sub>22</sub> O <sub>11</sub> | [M+H] <sup>+</sup>  | 463.12335 | -0.296 | 301.07077, 286.04666, 258.05255, 229.01440, 203.08521, 153.01833                                                                | Diosmetin-7- <i>O</i> - $\beta$ -D-glucoside isomer                                | Flavanoid       | DPI                |
| <b>105</b>             | 22.336 | C <sub>23</sub> H <sub>22</sub> O <sub>11</sub> | [M+H] <sup>+</sup>  | 475.12320 | -0.604 | 321.11829, 271.05997, 229.02536, 153.01868, 69.05105                                                                            | Apigenin-5(4')- <i>O</i> -(6"- <i>O</i> -acetyl)- $\beta$ -D-glucopyranoside       | Flavanoid       | DPI                |
| <b>106</b>             | 22.375 | C <sub>25</sub> H <sub>24</sub> O <sub>14</sub> | [M+H] <sup>+</sup>  | 549.12366 | -0.402 | 301.07059, 286.04706, 229.05098, 153.01842                                                                                      | Diosmetin-7- <i>O</i> -(6"-malonylglucoside) isomer                                | Flavanoid       | DPI                |
| <b>107<sup>*</sup></b> | 22.522 | C <sub>15</sub> H <sub>24</sub> O <sub>3</sub>  | [M+Na] <sup>+</sup> | 275.16177 | 0.017  | 229.03706, 165.08846, 156.70496, 55.96776                                                                                       | Chrysanthemum C                                                                    | Sesquiterpenoid | In-house database  |
| <b>108<sup>*</sup></b> | 22.809 | C <sub>15</sub> H <sub>24</sub> O <sub>3</sub>  | [M+Na] <sup>+</sup> | 275.16187 | 0.381  | 229.01579, 175.07280, 165.59151, 73.07964, 60.67187, 57.18082                                                                   | Indicumenone                                                                       | Sesquiterpenoid | In-house database  |
| <b>109</b>             | 22.870 | C <sub>25</sub> H <sub>26</sub> O <sub>14</sub> | [M+H] <sup>+</sup>  | 551.13928 | -0.455 | 303.09612, 195.02802, 177.05460, 171.02875, 153.01814, 137.05942, 135.04376, 117.03326, 89.03845                                | Hesperetin-7- <i>O</i> -(6"-malonylglucoside)                                      | Flavanoid       | DPI                |
| <b>110<sup>*</sup></b> | 23.168 | C <sub>15</sub> H <sub>24</sub> O <sub>3</sub>  | [M+Na] <sup>+</sup> | 275.16162 | -0.528 | 209.03229, 203.08496, 165.08850, 165.08850, 117.48495, 97.72261                                                                 | Chrysetunone                                                                       | Sesquiterpenoid | In-house database  |
| <b>111</b>             | 23.224 | C <sub>18</sub> H <sub>30</sub> O <sub>8</sub>  | [M+H] <sup>+</sup>  | 375.20135 | 0.018  | 321.17029, 285.14783, 235.13313, 217.12192, 195.13832, 177.12714, 147.11668, 135.11697, 133.10094, 93.06985, 91.05402, 79.05418 | 3- <i>O</i> - $\beta$ -D-Glucopyranosylcucurbit acid                               | Others          | mzCloud            |
| <b>112</b>             | 23.366 | C <sub>34</sub> H <sub>42</sub> O <sub>19</sub> | [M+H] <sup>+</sup>  | 755.23865 | -0.866 | 285.07574, 242.05740, 153.01822, 135.04456, 133.06477, 129.05487, 85.02837                                                      | Acacetin-7- <i>O</i> -[2'''- <i>O</i> -rhamnosyl-2"- <i>O</i> -glucosyl]-glucoside | Flavanoid       | DPI                |
| <b>113</b>             | 23.922 | C <sub>28</sub> H <sub>32</sub> O <sub>15</sub> | [M+H] <sup>+</sup>  | 609.18109 | -0.501 | 285.07544, 242.05717, 153.01819, 133.06444, 97.02814, 91.05757, 90.04600, 85.02811                                              | Acacetin-di- <i>O</i> -glucoside                                                   | Flavanoid       | DPI                |

|                        |        |                                                 |                                     |           |        |                                                                                                                                                        |                                                                               |                     |                    |
|------------------------|--------|-------------------------------------------------|-------------------------------------|-----------|--------|--------------------------------------------------------------------------------------------------------------------------------------------------------|-------------------------------------------------------------------------------|---------------------|--------------------|
| <b>114</b>             | 23.929 | C <sub>20</sub> H <sub>22</sub> O <sub>6</sub>  | [M-H <sub>2</sub> O+H] <sup>+</sup> | 341.13837 | 0.060  | 291.10104, 271.09628, 229.03015, 203.08493, 187.07571, 151.07521, 137.05965                                                                            | Clemaphenol A isomer                                                          | Lignan              | mzCloud            |
| <b>115</b>             | 24.206 | C <sub>15</sub> H <sub>12</sub> O <sub>6</sub>  | [M+H] <sup>+</sup>                  | 289.07062 | -0.152 | 229.02617, 163.03912, 153.01834, 135.04420, 89.10366                                                                                                   | Eriodictyol isomer                                                            | Flavanoid           | mzCloud, mzVault   |
| <b>116<sup>#</sup></b> | 24.417 | C <sub>24</sub> H <sub>22</sub> O <sub>13</sub> | [M+H] <sup>+</sup>                  | 519.11310 | -0.417 | 271.05997, 243.06416, 229.05414, 171.02888, 163.03972, 153.01813, 145.02803, 119.04910, 91.05403, 68.99709, 67.01784                                   | Apigenin-7- <i>O</i> -malonylglucoside                                        | Flavanoid           | Reference standard |
| <b>117</b>             | 24.554 | C <sub>15</sub> H <sub>12</sub> O <sub>5</sub>  | [M+H] <sup>+</sup>                  | 273.07590 | 0.551  | 229.02840, 203.08495, 171.02873, 153.01828, 147.04414, 119.04909, 91.05421, 69.03361, 67.01788                                                         | Naringenin                                                                    | Flavanoid           | In-house database  |
| <b>118</b>             | 24.573 | C <sub>25</sub> H <sub>24</sub> O <sub>14</sub> | [M+H] <sup>+</sup>                  | 549.12347 | -0.748 | 409.01147, 345.02768, 327.01874, 301.07019, 286.04669, 258.05182, 229.04973, 153.01796, 68.99686                                                       | Diosmetin-7- <i>O</i> -(6"-malonylglucoside) isomer                           | Flavanoid           | DPI                |
| <b>119</b>             | 25.030 | C <sub>16</sub> H <sub>14</sub> O <sub>6</sub>  | [M+H] <sup>+</sup>                  | 303.08716 | 2.791  | 179.03293, 177.05519, 153.01837, 145.02844, 117.03345, 89.03856, 67.02286                                                                              | Hesperetin isomer                                                             | Flavanoid           | In-house database  |
| <b>120</b>             | 25.122 | C <sub>25</sub> H <sub>24</sub> O <sub>12</sub> | [M+Na] <sup>+</sup>                 | 539.11536 | -1.181 | 521.10254, 377.08395, 359.07404, 341.06332, 337.09274, 229.02202, 215.05226, 185.02069, 163.03896, 135.04338, 117.03045, 107.04896, 95.04901, 89.03852 | Dicaffeoyl quinic acid isomer                                                 | Caffeoylquinic acid | DPI                |
| <b>121</b>             | 25.323 | C <sub>25</sub> H <sub>24</sub> O <sub>14</sub> | [M+H] <sup>+</sup>                  | 549.12366 | -0.402 | 463.12891, 301.07059, 286.04712, 258.05209, 229.04926, 153.01816, 68.99689                                                                             | Diosmetin-7- <i>O</i> -(6"-malonylglucoside) isomer                           | Flavanoid           | DPI                |
| <b>122</b>             | 25.808 | C <sub>23</sub> H <sub>22</sub> O <sub>12</sub> | [M+H] <sup>+</sup>                  | 491.11816 | -0.492 | 287.05496, 269.04480, 241.05035, 231.06653, 213.05473, 185.05978, 171.02887, 161.02309, 153.01830, 135.04410, 117.03365, 107.04945, 89.03863           | Luteolin-7- <i>O</i> -(6"- <i>O</i> -acetyl)- $\beta$ -D-glucopyranoside      | Flavanoid           | In-house database  |
| <b>123</b>             | 25.809 | C <sub>27</sub> H <sub>30</sub> O <sub>14</sub> | [M+H] <sup>+</sup>                  | 579.17053 | -0.519 | 447.13290, 285.07574, 242.05705, 229.04337, 153.01788, 133.06496                                                                                       | Acacetin-7-(6- <i>O</i> - $\alpha$ -L-Arabinofuranosyl)- $\beta$ -D-glucoside | Flavanoid           | DPI                |
| <b>124<sup>#</sup></b> | 25.936 | C <sub>15</sub> H <sub>10</sub> O <sub>6</sub>  | [M+H] <sup>+</sup>                  | 287.05499 | -0.084 | 258.05061, 241.04927, 229.02545, 179.03528, 171.04494, 161.02321, 137.02328, 135.04402, 117.03347, 97.02847, 89.03853                                  | Luteolin                                                                      | Flavanoid           | Reference standard |
| <b>125</b>             | 26.355 | C <sub>27</sub> H <sub>30</sub> O <sub>14</sub> | [M+H] <sup>+</sup>                  | 579.17059 | -0.416 | 447.12955, 285.07574, 242.05737, 153.01825, 133.06467, 97.04607, 73.02825                                                                              | Acacetin-7-glucosyl-(1 $\rightarrow$ 4)-xyloside                              | Flavanoid           | DPI                |



|                        |        |                                                 |                                     |           |        |                                                                                                                                                                                                                                                             |                                                                                                     |                     |                    |
|------------------------|--------|-------------------------------------------------|-------------------------------------|-----------|--------|-------------------------------------------------------------------------------------------------------------------------------------------------------------------------------------------------------------------------------------------------------------|-----------------------------------------------------------------------------------------------------|---------------------|--------------------|
| <b>126</b>             | 26.577 | C <sub>16</sub> H <sub>12</sub> O <sub>7</sub>  | [M+H] <sup>+</sup>                  | 317.06549 | -0.280 | 302.04239, 274.04868, 168.00571, 140.01053, 137.02417, 117.19032, 112.01566, 97.54063                                                                                                                                                                       | Isorhamnetin                                                                                        | Flavanoid           | In-house database  |
| <b>127</b>             | 26.881 | C <sub>16</sub> H <sub>14</sub> O <sub>6</sub>  | [M+H] <sup>+</sup>                  | 303.08621 | -0.343 | 285.07488, 219.06575, 203.08504, 177.05475, 171.02849, 163.03947, 153.01819, 117.03346, 89.03854, 67.01784                                                                                                                                                  | Hesperetin isomer                                                                                   | Flavanoid           | In-house database  |
| <b>128</b>             | 26.960 | C <sub>17</sub> H <sub>14</sub> O <sub>8</sub>  | [M+H] <sup>+</sup>                  | 347.07599 | -0.441 | 332.05252, 317.02924, 261.03915, 186.01582, 169.01297, 133.02776                                                                                                                                                                                            | Spinacetin                                                                                          | Flavanoid           | In-house database  |
| <b>129<sup>#</sup></b> | 27.808 | C <sub>28</sub> H <sub>32</sub> O <sub>14</sub> | [M+H] <sup>+</sup>                  | 593.18634 | -0.237 | 285.07565, 270.07892, 242.05733, 171.02916, 159.04457, 153.01831, 133.06458, 85.02830, 71.04919                                                                                                                                                             | Acacetin-7- <i>O</i> - $\beta$ -D-rutinoside                                                        | Flavanoid           | Reference standard |
| <b>130</b>             | 28.103 | C <sub>36</sub> H <sub>44</sub> O <sub>20</sub> | [M+H] <sup>+</sup>                  | 797.24841 | -1.829 | 285.07565, 242.05753, 229.02330, 153.01875, 85.02863                                                                                                                                                                                                        | Acacetin-7- <i>O</i> -[6"- <i>O</i> -glucosyl-2"- <i>O</i> -(3'''-acetylramnosyl)] glucoside isomer | Flavanoid           | In-house database  |
| <b>131<sup>*</sup></b> | 28.112 | C <sub>15</sub> H <sub>24</sub> O <sub>2</sub>  | [M-H <sub>2</sub> O+H] <sup>+</sup> | 219.17444 | 0.452  | 203.14378, 201.16403, 191.17940, 175.14743, 162.92119, 161.13329, 159.11722, 145.10120, 135.11690, 133.101061, 131.08578, 121.10163, 119.08594, 109.10106, 105.06982, 95.08564, 93.07008, 91.05421, 81.06992, 67.05445, 55.05436                            | (1 <i>S</i> ,5 <i>R</i> ,9 <i>S</i> )-2,6-Bis(methylene)-9-(1-methylethenyl)-1,5-cyclodecanediol    | Sesquiterpenoid     | mzCloud, mzVault   |
| <b>132<sup>*</sup></b> | 28.199 | C <sub>15</sub> H <sub>24</sub> O <sub>2</sub>  | [M-H <sub>2</sub> O+H] <sup>+</sup> | 219.17438 | 0.178  | 201.16414, 161.13286, 159.11691, 145.10104, 135.11690, 133.10164, 131.08566, 129.07004, 121.10136, 119.08572, 109.10145, 107.08567, 105.07008, 95.08574, 93.07000, 91.05462, 83.04906, 81.06987, 79.05437, 84.96015, 69.07010, 67.05438, 57.07003, 55.05442 | (1 <i>R</i> ,5 <i>S</i> ,9 <i>R</i> )-2,6-Bis(methylene)-9-(1-methylethenyl)-1,5-cyclodecanediol    | Sesquiterpenoid     | mzCloud, mzVault   |
| <b>133</b>             | 28.268 | C <sub>15</sub> H <sub>24</sub> O <sub>3</sub>  | [M+Na] <sup>+</sup>                 | 275.16180 | 0.126  | 229.04546, 203.08495, 194.26845, 160.05701, 114.43626, 103.98212, 70.73609, 65.73772                                                                                                                                                                        | Ilicic acid                                                                                         | Sesquiterpene       | mzCloud            |
| <b>134</b>             | 28.331 | C <sub>25</sub> H <sub>24</sub> O <sub>12</sub> | [M-H <sub>2</sub> O+H] <sup>+</sup> | 499.12308 | -0.815 | 319.08200, 229.02893, 163.03897, 145.02849, 135.04420, 117.03345, 107.04929, 95.04925, 89.03848                                                                                                                                                             | Dicaffeoyl quinic acid isomer                                                                       | Caffeoylquinic acid | mzCloud            |
| <b>135</b>             | 28.416 | C <sub>36</sub> H <sub>44</sub> O <sub>20</sub> | [M+H] <sup>+</sup>                  | 797.24884 | -1.290 | 651.18628, 447.12512, 285.07581, 242.05748, 153.01828, 135.04420, 133.06482, 97.02829, 85.02842                                                                                                                                                             | Acacetin-7- <i>O</i> -[6"- <i>O</i> -glucosyl-2"- <i>O</i> -(3'''-acetylramnosyl)] glucoside isomer | Flavanoid           | In-house database  |
| <b>136</b>             | 28.446 | C <sub>15</sub> H <sub>18</sub> O <sub>8</sub>  | [M+H] <sup>+</sup>                  | 309.09683 | -0.157 | 229.02592, 202.10014, 147.04407, 119.04926, 91.05415                                                                                                                                                                                                        | <i>trans</i> -Melilotoside                                                                          | Phenylpropanoid     | mzVault            |

|                        |        |                                                 |                                     |           |        |                                                                                                                                                                                                            |                                                                          |                 |                    |
|------------------------|--------|-------------------------------------------------|-------------------------------------|-----------|--------|------------------------------------------------------------------------------------------------------------------------------------------------------------------------------------------------------------|--------------------------------------------------------------------------|-----------------|--------------------|
| <b>137</b>             | 28.555 | C <sub>33</sub> H <sub>30</sub> O <sub>17</sub> | [M+H] <sup>+</sup>                  | 699.15668 | 1.581  | 289.07065, 229.03296, 163.03893, 153.01817, 135.04396, 117.03356, 97.02837, 89.03863                                                                                                                       | Eriodictyol-7- <i>O</i> -(6"- <i>O</i> -malonyl-6'-glucosyl) glucoside   | Flavanoid       | DPI                |
| <b>138</b>             | 28.611 | C <sub>10</sub> H <sub>12</sub> O <sub>4</sub>  | [M+H] <sup>+</sup>                  | 197.08081 | -0.126 | 179.07007, 155.07022, 151.07524, 133.06464, 123.08009, 95.04897, 91.05411, 81.03331, 79.05407, 68.99706, 53.03848                                                                                          | Xanthoxyline                                                             | Phenol          | mzVault            |
| <b>139*</b>            | 29.147 | C <sub>15</sub> H <sub>24</sub> O <sub>2</sub>  | [M-H <sub>2</sub> O+H] <sup>+</sup> | 219.17433 | -0.050 | 201.16367, 173.13327, 161.13251, 159.11699, 145.10121, 135.11665, 133.10136, 131.08557, 121.10101, 119.08552, 117.06980, 109.10111, 107.08537, 105.06983, 95.08557, 93.06982, 91.05417, 81.06987, 67.05420 | Eleganodiol                                                              | Sesquiterpenoid | mzCloud, mzVault   |
| <b>140</b>             | 29.178 | C <sub>23</sub> H <sub>22</sub> O <sub>11</sub> | [M+H] <sup>+</sup>                  | 475.12317 | -0.667 | 271.05948, 229.04599, 203.08504, 153.01785, 145.02811, 119.04878, 91.05401, 68.99702, 67.01772                                                                                                             | Apigenin-7- <i>O</i> -(6"- <i>O</i> -acetyl)- $\beta$ -D-glucopyranoside | Flavanoid       | DPI                |
| <b>141</b>             | 29.338 | C <sub>24</sub> H <sub>24</sub> O <sub>11</sub> | [M+H] <sup>+</sup>                  | 447.12842 | -0.341 | 360.07956, 285.07578, 270.05228, 242.05733, 153.01784, 133.06477, 91.05758                                                                                                                                 | Acacetin 7- <i>O</i> - $\beta$ -D-glucopyranoside                        | Flavanoid       | In-house database  |
| <b>142</b>             | 29.604 | C <sub>25</sub> H <sub>24</sub> O <sub>13</sub> | [M+H] <sup>+</sup>                  | 533.12866 | -0.574 | 489.17526, 285.07559, 270.05222, 242.05727, 213.05408, 171.02890, 153.01819, 133.06427, 118.04117, 67.01779                                                                                                | Acacetin-7- <i>O</i> -(6"-malonylglucoside) isomer                       | Flavanoid       | DPI                |
| <b>143</b>             | 29.663 | C <sub>24</sub> H <sub>24</sub> O <sub>12</sub> | [M+H] <sup>+</sup>                  | 505.13382 | -0.459 | 301.07037, 286.04697, 258.05228, 229.01863, 153.01834                                                                                                                                                      | Diosmetin-7-(6"-acetylglucoside)                                         | Flavanoid       | DPI                |
| <b>144<sup>#</sup></b> | 29.930 | C <sub>15</sub> H <sub>10</sub> O <sub>5</sub>  | [M+H] <sup>+</sup>                  | 271.05945 | -2.396 | 243.006442, 229.04283, 225.05389, 171.02852, 153.01788, 145.02776, 121.02822, 119.04874, 91.05399, 68.99594, 67.01771                                                                                      | Apigenin                                                                 | Flavanoid       | Reference standard |
| <b>145</b>             | 30.066 | C <sub>24</sub> H <sub>24</sub> O <sub>11</sub> | [M+H] <sup>+</sup>                  | 489.13882 | -0.648 | 285.07574, 270.05237, 242.05736, 203.08498, 153.01823, 133.06462, 103.05415, 81.03352, 68.99697                                                                                                            | Acacetin-7-(6"-acetylglucoside) isomer                                   | Flavanoid       | DPI                |
| <b>146</b>             | 30.179 | C <sub>17</sub> H <sub>14</sub> O <sub>7</sub>  | [M+H] <sup>+</sup>                  | 331.08136 | 0.397  | 315.04990, 285.04053, 229.04539, 203.03584, 153.01837                                                                                                                                                      | Tricin isomer                                                            | Flavanoid       | In-house database  |
| <b>147</b>             | 30.243 | C <sub>18</sub> H <sub>16</sub> O <sub>8</sub>  | [M+H] <sup>+</sup>                  | 361.09183 | 0.102  | 346.06775, 315.05301, 285.03983, 229.05064, 169.01332, 163.04027, 84.02099                                                                                                                                 | Chrysosplenol D isomer                                                   | Flavanoid       | In-house database  |

|                        |        |                                                               |                                     |           |        |                                                                                                                                                         |                                                    |           |                    |
|------------------------|--------|---------------------------------------------------------------|-------------------------------------|-----------|--------|---------------------------------------------------------------------------------------------------------------------------------------------------------|----------------------------------------------------|-----------|--------------------|
| <b>148*</b>            | 30.411 | C <sub>17</sub> H <sub>14</sub> O <sub>7</sub>                | [M+H] <sup>+</sup>                  | 331.08115 | -0.237 | 316.05722, 315.04980, 303.08963, 287.05310, 273.04056, 258.05203, 248.03435, 245.04510, 242.05727, 203.03364, 186.01561, 168.00602, 153.01823, 84.95956 | Jaceosidin                                         | Flavanoid | In-house database  |
| <b>149</b>             | 30.452 | C <sub>24</sub> H <sub>24</sub> O <sub>11</sub>               | [M+H] <sup>+</sup>                  | 489.13879 | -0.709 | 285.07568, 270.05209, 242.05716, 229.03859, 153.01865, 145.60489, 96.00800, 65.55325                                                                    | Acacetin-7-(6"-acetylglucoside) isomer             | Flavanoid | DPI                |
| <b>150<sup>#</sup></b> | 30.496 | C <sub>16</sub> H <sub>12</sub> O <sub>6</sub>                | [M+H] <sup>+</sup>                  | 301.07037 | -0.977 | 286.04688, 258.05194, 229.04887, 153.01804, 106.04115, 58.59438, 54.55778                                                                               | Diosmetin                                          | Flavanoid | Reference standard |
| <b>151</b>             | 30.525 | C <sub>46</sub> H <sub>50</sub> N <sub>4</sub> O <sub>8</sub> | [M+H] <sup>+</sup>                  | 787.36951 | -0.799 | 641.33398, 623.32062, 495.29810, 477.28815, 250.25378, 275.17529, 203.11819, 147.04408, 129.13860, 119.04903, 112.11247, 91.05423                       | Tetra-trans- <i>p</i> -coumaroylspermine isomer    | Others    | mzCloud            |
| <b>152</b>             | 30.649 | C <sub>18</sub> H <sub>16</sub> O <sub>8</sub>                | [M+H] <sup>+</sup>                  | 361.09177 | -0.064 | 346.06744, 345.05997, 329.06235, 311.05441, 303.05026, 285.03952, 257.04462, 137.02342                                                                  | Chrysosplenol D isomer                             | Flavanoid | In-house database  |
| <b>153</b>             | 30.659 | C <sub>25</sub> H <sub>24</sub> O <sub>12</sub>               | [M+H] <sup>+</sup>                  | 517.13385 | -0.390 | 287.05472, 229.03055, 197.27641, 153.01787, 135.04436, 69.03355                                                                                         | Luteolin-3- (2",4"-diacetylramnoside)              | Flavanoid | DPI                |
| <b>154</b>             | 31.093 | C <sub>25</sub> H <sub>24</sub> O <sub>13</sub>               | [M+H] <sup>+</sup>                  | 533.12872 | -0.462 | 285.07568, 270.05231, 243.06067, 153.01823, 133.06464, 96.93819, 67.01781                                                                               | Acacetin-7- <i>O</i> -(6"-malonylglucoside) isomer | Flavanoid | DPI                |
| <b>155</b>             | 31.315 | C <sub>12</sub> H <sub>18</sub> O <sub>2</sub>                | [M-H <sub>2</sub> O+H] <sup>+</sup> | 177.12732 | -0.401 | 159.11748, 135.11717, 133.10144, 129.06981, 93.07021, 91.05457, 81.07000, 67.05429, 56.96484                                                            | Sedanolid                                          | Others    | mzCloud            |
| <b>156</b>             | 31.468 | C <sub>17</sub> H <sub>14</sub> O <sub>7</sub>                | [M+H] <sup>+</sup>                  | 331.08139 | 0.487  | 316.05789, 315.05048, 271.13205, 245.04543, 229.04176, 202.05348, 153.01926                                                                             | Tricin isomer                                      | Flavanoid | In-house database  |
| <b>157</b>             | 31.478 | C <sub>18</sub> H <sub>16</sub> O <sub>8</sub>                | [M+H] <sup>+</sup>                  | 361.09192 | 0.351  | 346.06812, 345.06073, 303.04993, 285.03909, 229.05048, 169.01335, 155.04848, 137.05952                                                                  | Chrysosplenol D isomer                             | Flavanoid | In-house database  |
| <b>158</b>             | 31.663 | C <sub>46</sub> H <sub>50</sub> N <sub>4</sub> O <sub>8</sub> | [M+H] <sup>+</sup>                  | 787.36981 | -0.418 | 641.33209, 623.32770, 495.29785, 477.28641, 281.31509, 275.17642, 147.04398, 129.13895, 119.04897, 112.11243, 91.05412                                  | Tetra-trans- <i>p</i> -coumaroylspermine isomer    | Others    | mzCloud            |
| <b>159</b>             | 31.969 | C <sub>19</sub> H <sub>18</sub> O <sub>8</sub>                | [M+H] <sup>+</sup>                  | 375.10745 | 0.018  | 361.08704, 360.08359, 359.07605, 314.07858, 315.08417, 203.08507, 163.03891, 68.99719                                                                   | Dihydroxy tetramethoxyflavone isomer               | Flavanoid | In-house database  |

|            |        |                                                               |                     |           |        |                                                                                                                                             |                                                 |                  |                   |
|------------|--------|---------------------------------------------------------------|---------------------|-----------|--------|---------------------------------------------------------------------------------------------------------------------------------------------|-------------------------------------------------|------------------|-------------------|
| <b>160</b> | 32.150 | C <sub>46</sub> H <sub>50</sub> N <sub>4</sub> O <sub>8</sub> | [M+H] <sup>+</sup>  | 787.36951 | -0.799 | 712.30170, 641.33246, 623.32050, 495.29630, 477.28906, 275.17535, 204.10178, 147.04404, 129.13852, 119.04905, 112.11197, 91.05415           | Tetra-trans- <i>p</i> -coumaroylspermine isomer | Others           | mzCloud           |
| <b>161</b> | 32.308 | C <sub>18</sub> H <sub>16</sub> O <sub>7</sub>                | [M+H] <sup>+</sup>  | 345.09689 | 0.033  | 330.07248, 312.06241, 284.06754, 269.04407, 256.07190, 241.04852, 229.03426, 149.05948, 106.02106                                           | Eupatilin isomer                                | Flavanoid        | In-house database |
| <b>162</b> | 32.386 | C <sub>25</sub> H <sub>24</sub> O <sub>11</sub>               | [M+H] <sup>+</sup>  | 501.13916 | 0.046  | 483.19000, 271.06024, 252.10268, 219.89361, 202.10017, 179.28593, 153.01805, 145.02878, 119.04967, 97.02795, 91.05433, 69.03357, 67.01803   | Apigenin-7-(6"-crotonylglucoside)               | Flavanoid        | DPI               |
| <b>163</b> | 32.492 | C <sub>21</sub> H <sub>22</sub> O <sub>6</sub>                | [M+H] <sup>+</sup>  | 371.14883 | -0.226 | 335.12714, 305.11664, 303.10172, 293.11731, 245.09727, 199.07547, 177.09093, 175.03880, 151.07526, 135.04395, 131.04909, 95.04915, 79.05418 | Kusunokinin                                     | Lignan           | mzCloud           |
| <b>164</b> | 32.637 | C <sub>21</sub> H <sub>22</sub> O <sub>6</sub>                | [M+H] <sup>+</sup>  | 371.14890 | -0.038 | 353.13806, 335.12726, 203.08505, 161.05948, 151.07527, 135.04391, 131.04897, 107.04897, 103.05405, 91.05367                                 | Bursehernin                                     | Lignan           | mzVault           |
| <b>165</b> | 32.815 | C <sub>19</sub> H <sub>26</sub> O <sub>6</sub>                | [M+Na] <sup>+</sup> | 373.16    | 2.066  | 313.14053, 271.13022, 253.11945, 231.13818, 157.10114, 142.07777, 129.07016, 105.07031, 83.01060                                            | 1,6- <i>O,O</i> -Diacetylbritannilactone        | Sesquiterpene    | mzVault           |
| <b>166</b> | 32.837 | C <sub>18</sub> H <sub>16</sub> O <sub>7</sub>                | [M+H] <sup>+</sup>  | 345.09717 | 0.844  | 330.07297, 291.13577, 287.05508, 229.02347, 203.08496, 186.01569, 169.01283, 140.01025, 91.05415                                            | Eupatilin isomer                                | Flavanoid        | In-house database |
| <b>167</b> | 32.909 | C <sub>19</sub> H <sub>18</sub> O <sub>8</sub>                | [M+H] <sup>+</sup>  | 375.10760 | 0.418  | 360.08366, 359.07648, 314.07870, 299.05499, 253.04901, 225.05502, 203.08525, 163.03891                                                      | Dihydroxy tetramethoxyflavone isomer            | Flavanoid        | In-house database |
| <b>168</b> | 33.039 | C <sub>19</sub> H <sub>18</sub> O <sub>8</sub>                | [M+H] <sup>+</sup>  | 375.10739 | -0.142 | 345.06067, 317.06552, 299.05475, 271.06030, 217.05019, 175.03909, 151.03891, 151.05196                                                      | Dihydroxy tetramethoxyflavone isomer            | Flavanoid        | In-house database |
| <b>169</b> | 33.378 | C <sub>24</sub> H <sub>24</sub> O <sub>11</sub>               | [M+H] <sup>+</sup>  | 489.13876 | -0.771 | 285.07566, 270.05219, 242.05736, 229.02145, 213.05499, 153.01825, 133.06493, 81.03361                                                       | Acacetin-7-(6"-acetylglucoside) isomer          | Flavanoid        | DPI               |
| <b>170</b> | 33.384 | C <sub>18</sub> H <sub>28</sub> O <sub>3</sub>                | [M+H] <sup>+</sup>  | 293.21106 | -0.205 | 275.20197, 239.18025, 229.01541, 163.11189, 143.04709, 133.10138, 107.08582, 91.05415, 81.06974, 79.05423, 67.05424                         | 12-Oxophytodienoic acid isomer                  | Fatty acid ester | mzCloud           |

|                        |        |                                                               |                                     |           |        |                                                                                                                                                               |                                          |            |                    |
|------------------------|--------|---------------------------------------------------------------|-------------------------------------|-----------|--------|---------------------------------------------------------------------------------------------------------------------------------------------------------------|------------------------------------------|------------|--------------------|
| <b>171</b>             | 33.384 | C <sub>22</sub> H <sub>17</sub> N <sub>3</sub> O <sub>5</sub> | [M+H] <sup>+</sup>                  | 404.12405 | -0.115 | 372.09760, 344.10312, 329.07944, 301.08548, 229.04362, 183.05623, 172.03908, 156.04483, 129.04440, 134.05992                                                  | Azoxystrobin                             | Others     | mzCloud            |
| <b>172</b>             | 33.582 | C <sub>19</sub> H <sub>18</sub> O <sub>8</sub>                | [M+H] <sup>+</sup>                  | 375.10742 | -0.062 | 360.08377, 359.07706, 327.05139, 299.05640, 271.06134, 257.04550, 169.01334, 81.01875                                                                         | Dihydroxy tetramethoxyflavone isomer     | Flavanoid  | In-house database  |
| <b>173</b>             | 33.622 | C <sub>18</sub> H <sub>16</sub> O <sub>7</sub>                | [M+H] <sup>+</sup>                  | 345.09705 | 0.497  | 330.07251, 315.05017, 284.06870, 255.06522, 203.08492, 169.01218, 140.27768                                                                                   | Eupatilin isomer                         | Flavanoid  | In-house database  |
| <b>174</b>             | 33.741 | C <sub>19</sub> H <sub>18</sub> O <sub>8</sub>                | [M+H] <sup>+</sup>                  | 375.10733 | -0.302 | 361.08667, 360.08359, 359.07617, 345.06061, 317.06546, 299.05453, 229.04692, 169.01312, 135.04387, 121.02825                                                  | Dihydroxy tetramethoxyflavone isomer     | Flavanoid  | In-house database  |
| <b>175</b>             | 33.871 | C <sub>19</sub> H <sub>18</sub> O <sub>7</sub>                | [M+H] <sup>+</sup>                  | 359.11255 | 0.060  | 331.18857, 326.07822, 229.02202, 202.10019, 201.09071                                                                                                         | 5-Hydroxy-3',4',6,7-tetramethoxyflavone  | Flavanoid  | In-house database  |
| <b>176</b>             | 34.468 | C <sub>20</sub> H <sub>20</sub> O <sub>8</sub>                | [M+H] <sup>+</sup>                  | 389.1229  | -0.497 | 356.08871, 328.09406, 295.05966, 285.07431, 267.06519, 177.05441, 149.06026, 131.04886                                                                        | Artemisetin isomer                       | Flavanoid  | In-house database  |
| <b>177*</b>            | 34.663 | C <sub>20</sub> H <sub>20</sub> O <sub>8</sub>                | [M+H] <sup>+</sup>                  | 389.12326 | 0.429  | 373.09186, 359.07642, 356.08887, 341.06577, 331.08130, 313.07056, 297.07541, 273.03949, 165.05475, 135.04436, 121.02835                                       | Artemisetin                              | Flavanoid  | In-house database  |
| <b>178</b>             | 34.706 | C <sub>18</sub> H <sub>32</sub> O <sub>4</sub>                | [M-H <sub>2</sub> O+H] <sup>+</sup> | 295.22665 | -0.407 | 277.21769, 229.02461, 203.08492, 165.12770, 151.11218, 133.10013, 125.09658, 111.08073, 105.06979, 99.08027, 95.08570, 93.07011, 81.06985, 67.05425, 55.05411 | 13-Hydroperoxylinoleic acid              | Fatty acid | mzCloud            |
| <b>179</b>             | 34.828 | C <sub>18</sub> H <sub>34</sub> O <sub>4</sub>                | [M-H <sub>2</sub> O+H] <sup>+</sup> | 297.24231 | -0.371 | 279.23254, 261.22214, 203.08495, 135.11667, 123.11704, 109.10138, 95.08558, 81.06976, 67.05425                                                                | η-Hydroxy-3-octyl-2-oxiraneoctanoic acid | Fatty acid | mzCloud            |
| <b>180<sup>#</sup></b> | 34.924 | C <sub>16</sub> H <sub>12</sub> O <sub>5</sub>                | [M+H] <sup>+</sup>                  | 285.07574 | -0.033 | 270.05237, 242.05739, 153.01828, 133.06473, 124.01496, 118.04072, 90.04630, 68.99710, 67.01776                                                                | Acacetin                                 | Flavanoid  | Reference standard |
| <b>181</b>             | 35.457 | C <sub>20</sub> H <sub>18</sub> O <sub>6</sub>                | [M-H <sub>2</sub> O+H] <sup>+</sup> | 337.10706 | 0.031  | 319.09738, 289.08655, 267.06558, 261.09152, 229.02910, 203.08508, 185.05948, 135.04407, 129.07016, 79.05458, 77.03830                                         | Sesamin                                  | Lignan     | mzCloud            |

|     |        |                                                |                                     |           |        |                                                                                                                                                                  |                                               |                  |         |
|-----|--------|------------------------------------------------|-------------------------------------|-----------|--------|------------------------------------------------------------------------------------------------------------------------------------------------------------------|-----------------------------------------------|------------------|---------|
| 182 | 35.532 | C <sub>15</sub> H <sub>24</sub> O <sub>2</sub> | [M-H <sub>2</sub> O+H] <sup>+</sup> | 219.17448 | -1.869 | 201.16397, 173.13269, 163.11157, 145.10121, 135.08055, 119.08559, 107.08549, 95.08551, 93.06987, 81.06995, 67.05430                                              | <i>α</i> -Cyperone                            | Sesquiterpene    | mzVault |
| 183 | 36.799 | C <sub>15</sub> H <sub>26</sub> O <sub>2</sub> | [M+Na] <sup>+</sup>                 | 261.18246 | -0.156 | 229.02008, 141.96776, 118.73338, 93.66092, 83.32710                                                                                                              | Drimendiol                                    | Sesquiterpene    | mzCloud |
| 184 | 38.277 | C <sub>18</sub> H <sub>28</sub> O <sub>3</sub> | [M+H] <sup>+</sup>                  | 293.21103 | -0.308 | 275.20071, 257.19025, 219.13824, 201.12762, 173.13243, 143.04716, 123.08078, 93.06971, 91.05434, 81.06988, 67.05415                                              | 12-Oxophytodienoic acid isomer                | Fatty acid ester | mzCloud |
| 185 | 38.703 | C <sub>18</sub> H <sub>28</sub> O <sub>3</sub> | [M+H] <sup>+</sup>                  | 293.21112 | -0.001 | 275.20053, 257.19000, 219.13771, 173.13284, 147.11679, 145.10118, 133.10120, 119.08537, 93.06976, 91.05411, 81.06985, 67.05419                                   | 12-Oxophytodienoic acid isomer                | Fatty acid ester | mzCloud |
| 186 | 39.146 | C <sub>15</sub> H <sub>22</sub> O              | [M+H] <sup>+</sup>                  | 219.17430 | -0.187 | 201.16393, 177.12675, 163.11176, 137.09610, 135.08034, 123.08035, 111.08034, 109.10110, 97.06470, 95.08541, 81.06985, 79.05414, 67.05421                         | Nootkatone                                    | Sesquiterpene    | mzVault |
| 187 | 40.927 | C <sub>18</sub> H <sub>30</sub> O <sub>3</sub> | [M+Na] <sup>+</sup>                 | 317.2086  | -0.363 | 295.22632, 277.21597, 259.20547, 249.22208, 231.21028, 179.14342, 161.13252, 151.11160, 147.11697, 119.08530, 105.06972, 91.05408, 81.03341, 79.05418, 67.054185 | 9-Oxo-10(E),12(E)-octadecadienoic acid isomer | Fatty acid       | mzCloud |
| 188 | 41.063 | C <sub>18</sub> H <sub>30</sub> O <sub>2</sub> | [M+H] <sup>+</sup>                  | 279.23175 | -0.378 | 229.02982, 202.10031, 181.04851, 149.02327, 121.02864, 95.08550, 81.06974, 67.05412                                                                              | <i>α</i> -Linolenic acid                      | Fatty acid       | mzCloud |
| 189 | 41.112 | C <sub>18</sub> H <sub>30</sub> O <sub>3</sub> | [M+H] <sup>+</sup>                  | 295.22668 | -0.306 | 277.21603, 249.22159, 231.21220, 161.13200, 151.11160, 133.10129, 105.06983, 95.04908, 91.05402, 81.03344, 67.05423, 55.05421                                    | 9-Oxo-10(E),12(E)-octadecadienoic acid isomer | Fatty acid       | mzCloud |
| 190 | 41.241 | C <sub>18</sub> H <sub>32</sub> O <sub>3</sub> | [M-H <sub>2</sub> O+H] <sup>+</sup> | 279.23181 | -0.163 | 261.22034, 149.02370, 123.11684, 121.10119, 109.10110, 95.08549, 81.06987, 67.05424                                                                              | Dimorphecolic acid isomer                     | Fatty acid       | mzCloud |
| 191 | 41.586 | C <sub>18</sub> H <sub>32</sub> O <sub>3</sub> | [M-H <sub>2</sub> O+H] <sup>+</sup> | 279.23178 | -0.271 | 249.22823, 229.01704, 202.10017, 173.13477, 149.02335, 121.02879, 95.08532, 81.06988, 67.05427                                                                   | Dimorphecolic acid isomer                     | Fatty acid       | mzCloud |

|             |        |                                                 |                                     |           |        |                                                                                                                                                                           |                                           |                  |         |
|-------------|--------|-------------------------------------------------|-------------------------------------|-----------|--------|---------------------------------------------------------------------------------------------------------------------------------------------------------------------------|-------------------------------------------|------------------|---------|
| <b>192</b>  | 41.951 | C <sub>30</sub> H <sub>48</sub> O <sub>2</sub>  | [M+H] <sup>+</sup>                  | 423.36200 | -0.333 | 229.02705, 203.08496, 189.16454, 187.14766, 161.15240, 159.11652, 145.10201, 123.11671, 119.08583, 107.08533, 105.06918, 95.08533, 93.06978, 81.06992, 79.05436, 67.05445 | <i>β</i> -Amyrenonol isomer               | Triterpenoids    | mzCloud |
| <b>193*</b> | 42.187 | C <sub>30</sub> H <sub>50</sub> O <sub>3</sub>  | [M+H] <sup>+</sup>                  | 481.36478 | -0.904 | 428.33728, 281.30057, 229.02896, 153.96141, 67.07063                                                                                                                      | Heliantriol C                             | Triterpenoids    | mzCloud |
| <b>194</b>  | 42.280 | C <sub>18</sub> H <sub>34</sub> O <sub>3</sub>  | [M-H <sub>2</sub> O+H] <sup>+</sup> | 281.24756 | 0.193  | 250.17755, 245.22627, 229.02058, 197.24994, 161.13248, 149.13225, 133.10132, 109.10094, 97.10102, 95.08536, 83.08537, 69.06977, 55.05419                                  | Dihydroniloticin                          | Triterpenoids    | mzCloud |
| <b>195</b>  | 42.282 | C <sub>18</sub> H <sub>32</sub> O <sub>2</sub>  | [M+H] <sup>+</sup>                  | 263.23694 | -0.004 | 245.22719, 229.03304, 202.10066, 161.13353, 149.13286, 135.11694, 133.10147, 123.11706, 109.10124, 95.08549, 81.06991, 67.05427                                           | Octadec-9-ynoic acid isomer               | Fatty acid       | mzCloud |
| <b>196</b>  | 42.667 | C <sub>19</sub> H <sub>32</sub> O <sub>2</sub>  | [M+H] <sup>+</sup>                  | 293.24741 | -0.326 | 229.04060, 202.10022, 143.04736, 109.10153, 95.08541, 81.06993, 67.05427                                                                                                  | Octadecatrienoic acid methyl ester isomer | Fatty acid ester | mzCloud |
| <b>197</b>  | 43.570 | C <sub>21</sub> H <sub>38</sub> O <sub>4</sub>  | [M+H] <sup>+</sup>                  | 355.28427 | -0.042 | 337.27264, 291.40198, 263.23724, 245.22679, 229.04007, 163.14694, 161.13347, 133.10110, 121.10106, 109.10104, 95.08545, 81.06985, 67.05417                                | 1-Linoleoyl glycerol isomer               | Fatty acid ester | mzCloud |
| <b>198</b>  | 43.576 | C <sub>18</sub> H <sub>32</sub> O <sub>2</sub>  | [M+H] <sup>+</sup>                  | 263.23688 | -0.232 | 245.22797, 177.16411, 147.11653, 137.13280, 123.11695, 109.10086, 105.07020, 95.08552, 81.06991, 67.05426                                                                 | Octadec-9-ynoic acid isomer               | Fatty acid       | mzCloud |
| <b>199</b>  | 43.649 | C <sub>20</sub> H <sub>37</sub> NO <sub>2</sub> | [M+H] <sup>+</sup>                  | 324.28964 | -0.199 | 306.27484, 229.03700, 155.13139, 109.10117, 91.05419, 95.08518, 67.05419, 62.05997                                                                                        | Linoleoyl ethanolamide                    | Others           | mzCloud |
| <b>200</b>  | 44.007 | C <sub>21</sub> H <sub>38</sub> O <sub>4</sub>  | [M-H <sub>2</sub> O+H] <sup>+</sup> | 337.27383 | 0.325  | 229.03700, 212.22574, 109.10123, 105.06950, 95.08545, 93.06999, 81.06992, 67.05431                                                                                        | 1-Linoleoyl glycerol isomer               | Fatty acid ester | mzCloud |
| <b>201</b>  | 44.260 | C <sub>21</sub> H <sub>38</sub> O <sub>4</sub>  | [M-H <sub>2</sub> O+H] <sup>+</sup> | 337.27377 | 0.148  | 263.23792, 245.22693, 163.14888, 133.10069, 107.10098, 95.08540, 81.06982, 67.05420                                                                                       | 1-Linoleoyl glycerol isomer               | Fatty acid ester | mzCloud |

|     |        |                                                |                    |           |        |                                                                                                                                         |                                           |                  |         |
|-----|--------|------------------------------------------------|--------------------|-----------|--------|-----------------------------------------------------------------------------------------------------------------------------------------|-------------------------------------------|------------------|---------|
| 202 | 44.261 | C <sub>18</sub> H <sub>32</sub> O <sub>2</sub> | [M+H] <sup>+</sup> | 263.23685 | -0.346 | 245.22519, 202.09967, 165.16396, 161.13351, 133.10139, 123.11722, 121.10155, 109.10125, 95.08543, 81.06982, 67.05421                    | Octadec-9-ynoic acid isomer               | Fatty acid ester | mzCloud |
| 203 | 44.775 | C <sub>30</sub> H <sub>50</sub> O <sub>2</sub> | [M+H] <sup>+</sup> | 425.37772 | -0.167 | 407.36685, 343.14902, 217.19499, 215.17989, 203.17975, 133.10120, 119.08549, 107.08543, 95.08550, 105.06965                             | Cycloart-25-ene-3 $\beta$ ,24-diol        | Triterpenoids    | mzCloud |
| 204 | 45.393 | C <sub>19</sub> H <sub>32</sub> O <sub>2</sub> | [M+H] <sup>+</sup> | 293.24756 | 0.185  | 261.22278, 229.02138, 202.10014, 143.04735, 123.11663, 109.10125, 95.08542, 81.06980, 67.05419                                          | Octadecatrienoic acid methyl ester isomer | Fatty acid ester | mzCloud |
| 205 | 46.180 | C <sub>30</sub> H <sub>48</sub> O <sub>2</sub> | [M+H] <sup>+</sup> | 441.37247 | -0.534 | 284.18378, 241.06819, 223.06180, 145.04965, 133.04990, 127.03887, 115.03881, 97.02829, 85.06982, 69.06985, 67.05431, 55.05421           | $\beta$ -Amyrenonol isomer                | Triterpenoids    | mzCloud |
| 206 | 46.276 | C <sub>30</sub> H <sub>48</sub> O <sub>2</sub> | [M+H] <sup>+</sup> | 441.37253 | -0.398 | 287.23706, 235.16924, 233.19038, 189.16327, 149.09604, 135.08026, 107.08528, 95.08544, 93.06975, 81.06976, 69.06979, 67.05416, 55.05415 | $\beta$ -Amyrenonol isomer                | Triterpenoids    | mzCloud |

<sup>#</sup>Identified by comparison with the standard; <sup>\*</sup>Verified through our previously established compound bank.



**Table S2**

The LC-MS data of the 27 in-source fragmentation products.

| No. | RT [min] | Predicted formula                               | Adduct             | Experimental m/z | Precursor compound                                                   | Lost group                       |
|-----|----------|-------------------------------------------------|--------------------|------------------|----------------------------------------------------------------------|----------------------------------|
| 1   | 1.864    | C <sub>15</sub> H <sub>12</sub> O <sub>7</sub>  | [M+H] <sup>+</sup> | 305.06553        | Taxifolin-7- <i>O</i> -glucuronide ( <b>11</b> )                     | Sugar unit                       |
| 2   | 8.224    | C <sub>15</sub> H <sub>10</sub> O <sub>6</sub>  | [M+H] <sup>+</sup> | 289.07056        | Eriodictyol-7-glucuronide isomer ( <b>33</b> )                       | Sugar unit                       |
| 3   | 9.725    | C <sub>15</sub> H <sub>10</sub> O <sub>6</sub>  | [M+H] <sup>+</sup> | 289.07054        | Eriodictyol-7- <i>O</i> - $\beta$ -D-glucopyranoside ( <b>38</b> )   | Sugar unit                       |
| 4   | 12.291   | C <sub>25</sub> H <sub>22</sub> O <sub>11</sub> | [M+H] <sup>+</sup> | 499.12330        | Dicaffeoyl quinic acid isomer ( <b>47</b> )                          | H <sub>2</sub> O                 |
| 5   | 13.312   | C <sub>15</sub> H <sub>10</sub> O <sub>6</sub>  | [M+H] <sup>+</sup> | 287.05365        | Luteolin-7- <i>O</i> - $\beta$ -D-glucopyranoside ( <b>52</b> )      | Sugar unit                       |
| 6   | 13.771   | C <sub>15</sub> H <sub>12</sub> O <sub>5</sub>  | [M+H] <sup>+</sup> | 273.07566        | Naringenin 7- <i>O</i> - $\beta$ -D-glucopyranoside ( <b>54</b> )    | Sugar unit                       |
| 7   | 13.910   | C <sub>16</sub> H <sub>18</sub> O <sub>9</sub>  | [M+H] <sup>+</sup> | 355.10237        | 3,4- <i>O</i> -Dicaffeoylquinic acid ( <b>55</b> )                   | Caffeoyl group                   |
| 8   | 13.925   | C <sub>16</sub> H <sub>18</sub> O <sub>9</sub>  | [M+H] <sup>+</sup> | 337.09179        | 3,4- <i>O</i> -Dicaffeoylquinic acid ( <b>55</b> )                   | Caffeoyl group; H <sub>2</sub> O |
| 9   | 13.928   | C <sub>25</sub> H <sub>22</sub> O <sub>11</sub> | [M+H] <sup>+</sup> | 499.12321        | 3,4- <i>O</i> -Dicaffeoylquinic acid ( <b>55</b> )                   | H <sub>2</sub> O                 |
| 10  | 15.076   | C <sub>25</sub> H <sub>22</sub> O <sub>11</sub> | [M+H] <sup>+</sup> | 499.12316        | 1,5- <i>O</i> -Dicaffeoyl quinic acid ( <b>69</b> )                  | H <sub>2</sub> O                 |
| 11  | 15.083   | C <sub>16</sub> H <sub>18</sub> O <sub>9</sub>  | [M+H] <sup>+</sup> | 337.09188        | 1,5- <i>O</i> -Dicaffeoyl quinic acid ( <b>69</b> )                  | Caffeoyl group; H <sub>2</sub> O |
| 12  | 15.100   | C <sub>16</sub> H <sub>18</sub> O <sub>9</sub>  | [M+H] <sup>+</sup> | 355.10238        | 1,5- <i>O</i> -Dicaffeoyl quinic acid ( <b>69</b> )                  | Caffeoyl group                   |
| 13  | 16.215   | C <sub>15</sub> H <sub>10</sub> O <sub>5</sub>  | [M+H] <sup>+</sup> | 271.06002        | Apiin isomer ( <b>72</b> )                                           | Sugar unit                       |
| 14  | 16.539   | C <sub>16</sub> H <sub>14</sub> O <sub>6</sub>  | [M+H] <sup>+</sup> | 303.08622        | Hesperetin-7- <i>O</i> - $\beta$ -D-glucopyranoside ( <b>75</b> )    | Sugar unit                       |
| 15  | 17.198   | C <sub>15</sub> H <sub>10</sub> O <sub>5</sub>  | [M+H] <sup>+</sup> | 271.05894        | Apigenin-7- <i>O</i> - $\beta$ -D-glucoside ( <b>79</b> )            | Sugar unit                       |
| 16  | 18.894   | C <sub>15</sub> H <sub>10</sub> O <sub>6</sub>  | [M+H] <sup>+</sup> | 287.05501        | Kaempferol-7- <i>O</i> - $\beta$ -D-glucoside ( <b>89</b> )          | Sugar unit                       |
| 17  | 18.929   | C <sub>15</sub> H <sub>12</sub> O <sub>7</sub>  | [M+H] <sup>+</sup> | 317.06544        | Isorhamnetin-3- <i>O</i> - $\beta$ -D-glucoside isomer ( <b>91</b> ) | Sugar unit                       |
| 18  | 19.242   | C <sub>16</sub> H <sub>18</sub> O <sub>9</sub>  | [M+H] <sup>+</sup> | 355.10240        | 4,5- <i>O</i> -Dicaffeoyl quinic acid ( <b>93</b> )                  | Caffeoyl group                   |
| 19  | 19.253   | C <sub>25</sub> H <sub>22</sub> O <sub>11</sub> | [M+H] <sup>+</sup> | 467.09719        | 4,5- <i>O</i> -Dicaffeoyl quinic acid ( <b>93</b> )                  | Undetermined                     |
| 20  | 19.268   | C <sub>25</sub> H <sub>22</sub> O <sub>11</sub> | [M+H] <sup>+</sup> | 499.12311        | 4,5- <i>O</i> -Dicaffeoyl quinic acid ( <b>93</b> )                  | H <sub>2</sub> O                 |
| 21  | 20.430   | C <sub>15</sub> H <sub>10</sub> O <sub>6</sub>  | [M+H] <sup>+</sup> | 287.05543        | Luteolin-7- <i>O</i> -(6"-malonylglucoside) ( <b>99</b> )            | Sugar unit                       |

|    |        |                                                 |                    |           |                                                                   |            |
|----|--------|-------------------------------------------------|--------------------|-----------|-------------------------------------------------------------------|------------|
| 22 | 24.419 | C <sub>15</sub> H <sub>10</sub> O <sub>5</sub>  | [M+H] <sup>+</sup> | 271.06031 | Apigenin-7- <i>O</i> -malonylglucoside ( <b>116</b> )             | Sugar unit |
| 23 | 27.832 | C <sub>16</sub> H <sub>12</sub> O <sub>5</sub>  | [M+H] <sup>+</sup> | 285.07442 | Acacetin-7- <i>O</i> - $\beta$ -D-rutinoside ( <b>129</b> )       | Sugar unit |
| 24 | 29.344 | C <sub>16</sub> H <sub>12</sub> O <sub>5</sub>  | [M+H] <sup>+</sup> | 285.07555 | Acacetin 7- <i>O</i> - $\beta$ -D-glucopyranoside ( <b>141</b> )  | Sugar unit |
| 25 | 31.094 | C <sub>16</sub> H <sub>12</sub> O <sub>5</sub>  | [M+H] <sup>+</sup> | 285.07613 | Acacetin-7- <i>O</i> -(6"-malonylglucoside) isomer ( <b>154</b> ) | Sugar unit |
| 26 | 33.383 | C <sub>16</sub> H <sub>12</sub> O <sub>5</sub>  | [M+H] <sup>+</sup> | 285.07593 | Acacetin-7-(6"-acetylglucoside) isomer ( <b>169</b> )             | Sugar unit |
| 27 | 27.832 | C <sub>24</sub> H <sub>24</sub> O <sub>11</sub> | [M+H] <sup>+</sup> | 447.1283  | Acacetin-7- <i>O</i> - $\beta$ -D-rutinoside ( <b>129</b> )       | Sugar unit |

---
